# Supplementary material for: Metabolites of lactic acid bacteria present in fermented foods are highly potent agonists of human hydroxycarboxylic acid receptor 3
Source: PubMed Central journal article supplement (PMC6532841; doi:10.1371/journal.pgen.1008145), 2019-05-23
Supplement: pgen.1008145.s009.pdf [file pgen.1008145.s009.pdf]

### Supplementary Table S2

NCBI database accession numbers and sequence description of one representative HCA<sub>1</sub> ortholog of *Chondrichthyes*, *Actinopterygii*, *Coelacanth*s and *Amphibia* and mammalian HCAR orthologs

| <i>Latin species name</i>            | <i>English species name</i>   | <i>NCBI or ENSEMBL accession number / trace identifiers of NCBI trace archive</i>                                                                                                                                                                                            |                  |                  |
|--------------------------------------|-------------------------------|------------------------------------------------------------------------------------------------------------------------------------------------------------------------------------------------------------------------------------------------------------------------------|------------------|------------------|
|                                      |                               | HCA <sub>1</sub>                                                                                                                                                                                                                                                             | HCA <sub>2</sub> | HCA <sub>3</sub> |
| <b><i>Chondrichthyes</i></b>         |                               |                                                                                                                                                                                                                                                                              |                  |                  |
| <i>Callorhynchus milii</i>           | elephant shark                | XM_007902210.1                                                                                                                                                                                                                                                               |                  |                  |
| <i>Rhincodon typus</i>               | whale shark                   | XM_020512881.1                                                                                                                                                                                                                                                               |                  |                  |
| <b><i>Actinopterygii</i></b>         |                               |                                                                                                                                                                                                                                                                              |                  |                  |
| <i>Astyanax mexicanus</i>            | Mexican tetra                 | XM_007250281.2                                                                                                                                                                                                                                                               |                  |                  |
| <i>Austrofundulus limnaeus</i>       |                               | XM_014023514.1                                                                                                                                                                                                                                                               |                  |                  |
| <i>Boleophthalmus pectinirostris</i> | great blue-spotted mudskipper | XM_020921815.1                                                                                                                                                                                                                                                               |                  |                  |
| <i>Clupea harengus</i>               | Atlantic herring              | XM_012827120.1                                                                                                                                                                                                                                                               |                  |                  |
| <i>Cynoglossus semilaevis</i>        | tongue sole                   | XM_008325648.2                                                                                                                                                                                                                                                               |                  |                  |
| <i>Cyprinodon variegatus</i>         | sheepshead minnow             | XM_015376811.1                                                                                                                                                                                                                                                               |                  |                  |
| <i>Cyprinus carpio</i>               | common carp                   | XM_019086953.1                                                                                                                                                                                                                                                               |                  |                  |
| <i>Danio rerio</i>                   | zebrafish                     | NM_001163292.1                                                                                                                                                                                                                                                               |                  |                  |
| <i>Esox lucius</i>                   | northern pike                 | XM_010877437.2                                                                                                                                                                                                                                                               |                  |                  |
| <i>Fundulus heteroclitus</i>         | mummichog                     | XM_012869599.2                                                                                                                                                                                                                                                               |                  |                  |
| <i>Gasterosteus aculeatus</i>        | three-spined stickleback      | trace archives gi:<br>902823148, 869593848,<br>849397327, 867304063,<br>867604810, 867234216,<br>855926790, 866492951,<br>867476020, 867514201,<br>867306594, 868023256,<br>863913155, 866753566,<br>868977227, 855931071,<br>864224968, 867300398,<br>831830686, 866340179) |                  |                  |
| <i>Haplochromis burtoni</i>          | Burton's mouthbrooder         | XM_005946323.2                                                                                                                                                                                                                                                               |                  |                  |
| <i>Ictalurus punctatus</i>           | channel catfish               | XM_017477394.1                                                                                                                                                                                                                                                               |                  |                  |
| <i>Kryptolebias marmoratus</i>       | mangrove rivulus              | XM_017440390.1                                                                                                                                                                                                                                                               |                  |                  |
| <i>Labrus bergylta</i>               | ballan wrasse                 | XM_020655416.1                                                                                                                                                                                                                                                               |                  |                  |

|                                     |                            |                                                                                                                                                                                                                                                   |
|-------------------------------------|----------------------------|---------------------------------------------------------------------------------------------------------------------------------------------------------------------------------------------------------------------------------------------------|
| <i>Larimichthys crocea</i>          | large yellow croaker       | XM_019278680.1                                                                                                                                                                                                                                    |
| <i>Lates calcarifer</i>             | barramundi perch           | XM_018696932.1                                                                                                                                                                                                                                    |
| <i>Lepisosteus oculatus</i>         | spotted gar                | XM_015366037.1                                                                                                                                                                                                                                    |
| <i>Maylandia zebra</i>              | zebra mbuna                | XM_004566929.3                                                                                                                                                                                                                                    |
| <i>Monopterus albus</i>             | swamp eel                  | XM_020588126.1                                                                                                                                                                                                                                    |
| <i>Neolamprologus brichardi</i>     | lyretail cichlid           | XM_006804703.1                                                                                                                                                                                                                                    |
| <i>Nothobranchius furzeri</i>       | turquoise killifish        | XM_015943374.1                                                                                                                                                                                                                                    |
| <i>Oncorhynchus kisutch</i>         | coho salmon                | XM_020484975.1                                                                                                                                                                                                                                    |
| <i>Oncorhynchus mykiss</i>          | rainbow trout              | XM_021622844.1                                                                                                                                                                                                                                    |
| <i>Oreochromis niloticus</i>        | Nile tilapia               | XM_005459638.3                                                                                                                                                                                                                                    |
| <i>Oryzias latipes</i>              | Japanese medaka            | XM_004074627.3                                                                                                                                                                                                                                    |
| <i>Poecilia formosa</i>             | Amazon molly               | XM_007570857.2                                                                                                                                                                                                                                    |
| <i>Poecilia latipinna</i>           | sailfin molly              | XM_015044560.1                                                                                                                                                                                                                                    |
| <i>Poecilia mexicana</i>            | shortfin molly             | XM_014999463.1                                                                                                                                                                                                                                    |
| <i>Poecilia reticulata</i>          | guppy                      | XM_008423323.2                                                                                                                                                                                                                                    |
| <i>Pundamilia nyererei</i>          | Nyerere's Victoria Cichlid | XM_005720042.1                                                                                                                                                                                                                                    |
| <i>Pygocentrus nattereri</i>        | red-bellied piranha        | XM_017681657.1                                                                                                                                                                                                                                    |
| <i>Salmo salar</i>                  | Atlantic salmon            | XM_014138487.1                                                                                                                                                                                                                                    |
| <i>Scleropages formosus</i>         | Asian bonytongue           | XM_018746830.1                                                                                                                                                                                                                                    |
| <i>Sinocyclocheilus anshuiensis</i> |                            | XM_016443409.1                                                                                                                                                                                                                                    |
| <i>Sinocyclocheilus grahami</i>     | Golden-line barbel         | XM_016237071.1                                                                                                                                                                                                                                    |
| <i>Sinocyclocheilus rhinoceros</i>  | horned Golden-line barbel  | XM_016530661.1                                                                                                                                                                                                                                    |
| <i>Stegastes partitus</i>           | bicolor damselfish         | XM_008305231.1                                                                                                                                                                                                                                    |
| <i>Takifugu rubripes</i>            | torafugu                   | XM_003965407.2                                                                                                                                                                                                                                    |
| <i>Tetraodon nigroviridis</i>       | spotted green pufferfish   | trace archives gi:<br>1144280996, 1144209422,<br>1145624449, 1143498005,<br>1143979005, 97629832,<br>99571522, 1141784461,<br>1144389438, 99115439,<br>1145624448, 95652118,<br>1143979227, 99054120,<br>1143718859, 1143981004<br>XM_005802492.1 |
| <i>Xiphophorus maculatus</i>        | southern platyfish         |                                                                                                                                                                                                                                                   |
| <b><i>Coelacanth</i></b>            |                            |                                                                                                                                                                                                                                                   |

|                                            |                      |                                                                                                                                                                                                                                                |                |
|--------------------------------------------|----------------------|------------------------------------------------------------------------------------------------------------------------------------------------------------------------------------------------------------------------------------------------|----------------|
| <i>Latimeria chalumnae</i>                 | coelacanth           | XM_005989018.1                                                                                                                                                                                                                                 |                |
| <b>Amphibia</b>                            |                      |                                                                                                                                                                                                                                                |                |
| <i>Nanorana parkeri</i>                    | Xizang plateau frog  | XM_018556801.1                                                                                                                                                                                                                                 |                |
| <i>Xenopus laevis</i>                      | African clawed frog  | XM_018226771.1                                                                                                                                                                                                                                 |                |
| <i>Xenopus tropicalis</i>                  | tropical clawed frog | XM_012968999.2                                                                                                                                                                                                                                 |                |
| <b>Mammalia</b>                            |                      |                                                                                                                                                                                                                                                |                |
| <i>Ailuropoda melanoleuca</i>              | Giant panda          | XM_011226294.1                                                                                                                                                                                                                                 | XM_002913130.2 |
| <i>Aotus nancymae</i>                      | Ma's night monkey    | XM_012447105.1                                                                                                                                                                                                                                 |                |
| <i>Balaenoptera acutorostrata scammoni</i> | Minke whale          | XM_007189590.1                                                                                                                                                                                                                                 |                |
| <i>Bison bison</i>                         | American bison       | XM_010841312.1                                                                                                                                                                                                                                 |                |
| <i>Bos grunniens mutus</i>                 | Yak                  | XM_005911827.1                                                                                                                                                                                                                                 |                |
| <i>Bos taurus</i>                          | Cattle               | NM_001145234.1                                                                                                                                                                                                                                 |                |
| <i>Bubalus bubalis</i>                     | Water buffalo        | XM_006047196.1                                                                                                                                                                                                                                 |                |
| <i>Callithrix jacchus</i>                  | Common marmoset      | XM_002753127.2                                                                                                                                                                                                                                 |                |
| <i>Camelus bactrianus</i>                  | Bactrian camel       | XM_010969698.1                                                                                                                                                                                                                                 |                |
| <i>Camelus dromedarius</i>                 | Arabian camel        | XM_010995910.1                                                                                                                                                                                                                                 |                |
| <i>Camelus ferus</i>                       | Wild Bactrian camel  | XM_006195843.1                                                                                                                                                                                                                                 |                |
| <i>Canis lupus familiaris</i>              | Dog                  | NM_001145231.1                                                                                                                                                                                                                                 |                |
| <i>Capra hircus</i>                        | Goat                 | XM_005709563.1                                                                                                                                                                                                                                 |                |
| <i>Cavia porcellus</i>                     | Guinea pig           | trace archives gi:<br>1582747945<br>1627289015<br>1645142123<br>1609973226<br>1654472717<br>1648840438<br>1608699595<br>1660358347<br>1656935446<br>1638015360<br>1612305650<br>808334221<br>810654609<br>763380574<br>763917813<br>1638586485 |                |

|                                     |                           |                |                                                                                                                                                                                                                     |          |
|-------------------------------------|---------------------------|----------------|---------------------------------------------------------------------------------------------------------------------------------------------------------------------------------------------------------------------|----------|
| <i>Ceratotherium simum simum</i>    | Southern white rhinoceros | XM_004444041.1 | XM_004444040.2                                                                                                                                                                                                      |          |
| <i>Cercocebus atys</i>              | Sooty mangabey            | XM_012071277.1 | XM_012071275.1                                                                                                                                                                                                      |          |
| <i>Chinchilla lanigera</i>          | Long-tailed chinchilla    | XM_005403075.1 | XM_005415327.1                                                                                                                                                                                                      |          |
| <i>Chlorocebus sabaeus</i>          | Green monkey              | XM_008005062.1 | XM_008005060.1                                                                                                                                                                                                      |          |
| <i>Chrysochloris asiatica</i>       | Cape golden mole          | XM_006865484.1 | XM_006878296.1                                                                                                                                                                                                      |          |
| <i>Colobus angolensis palliatus</i> | Angolan colobus           | XM_011948481.1 | XM_011948480.1                                                                                                                                                                                                      |          |
| <i>Condylura cristata</i>           | Star-nosed mole           | XM_004695933.2 | XM_004690624.1                                                                                                                                                                                                      |          |
| <i>Cricetulus griseus</i>           | Chinese hamster           | XM_007652908.1 | XM_003512415.1                                                                                                                                                                                                      |          |
| <i>Dasyopus novemcinctus</i>        | Nine-banded armadillo     | XM_004484978.2 | XM_004484979.2                                                                                                                                                                                                      |          |
| <i>Dipodomys ordii</i>              | Ord's kangaroo rat        | XM_013023063.1 | XM_013023107.1                                                                                                                                                                                                      |          |
| <i>Echinops telfairii</i>           | Lesser hedgehog tenrec    | XM_004709724.1 | XM_004709722.1                                                                                                                                                                                                      |          |
|                                     |                           |                | XM_004709723.1                                                                                                                                                                                                      |          |
| <i>Eptesicus fuscus</i>             | Big brown bat             | XM_008142901.1 | XM_008142902.1                                                                                                                                                                                                      |          |
| <i>Equus caballus</i>               | Horse                     | XM_005614958.1 | XM_005614972.2                                                                                                                                                                                                      |          |
| <i>Equus przewalskii</i>            | Przewalski's horse        | XM_008518469.1 | XM_008518468.1                                                                                                                                                                                                      |          |
| <i>Erinaceus europaeus</i>          | European hedgehog         | XM_007539798.1 | trace archives gi:<br>909569621<br>916868228<br>9197477<br>956896226<br>921926170<br>931620789<br>937804449<br>955617607<br>956096237<br>921892597<br>937763996<br>955550463<br>919608302<br>914608357<br>929672032 |          |
| <i>Felis catus</i>                  | Cat                       | XM_006938419.2 | NM_001309044.1                                                                                                                                                                                                      |          |
| <i>Galeopterus variegatus</i>       | Sunda flying lemur        | XM_008577706.1 | XM_008577707.1                                                                                                                                                                                                      |          |
| <i>Gorilla gorilla</i>              | Western gorilla           | KU285431       | KU285439                                                                                                                                                                                                            | KU285447 |
| <i>Heterocephalus glaber</i>        | Naked mole rat            | XM_004844096.1 | XM_004843902.1                                                                                                                                                                                                      |          |

|                                 |                                        |                                  |                                  |          |
|---------------------------------|----------------------------------------|----------------------------------|----------------------------------|----------|
| <i>Homo sapiens</i>             | Human                                  | KU285432                         | KU285440                         | KU285448 |
| <i>Hoolock leuconedys</i>       | eastern hoolock gibbon                 | SRX590196, SRX590198             | SRX590196, SRX590198             |          |
| <i>Hylobates moloch</i>         | silvery gibbon                         | SRX590190                        | SRX590190                        |          |
| <i>Hylobates pileatus</i>       | pileated gibbon                        | SRX590199                        | SRX590199                        |          |
| <i>Jaculus jaculus</i>          | Lesser Egyptian jerboa                 | XM_004673237.2                   | XM_004673240.2                   |          |
| <i>Leptonychotes weddellii</i>  | Weddell seal                           | XM_006752446.1                   | XM_006752452.1                   |          |
| <i>Lipotes vexillifer</i>       | Yangtze River dolphin                  | XM_007472205.1                   | XM_007472206.1                   |          |
| <i>Loxodonta africana</i>       | African bush elephant                  | XM_010599841.1                   | XM_003420333.1                   |          |
| <i>Macaca fascicularis</i>      | Crab-eating macaque                    | XM_005572512.1                   | XM_005596020.1                   |          |
| <i>Macaca mulatta</i>           | Rhesus macaque                         | NM_001145254.1                   | XR_012318.2                      |          |
| <i>Macaca nemestrina</i>        | Pig-tailed macaque                     | XM_011762566.1                   | XM_011762579.1                   |          |
| <i>Mandrillus leucophaeus</i>   | Drill                                  | XM_011964508.1                   | XM_011964507.1                   |          |
| <i>Mesocricetus auratus</i>     | Golden hamster                         | KP639582.1                       | KP639583.1                       |          |
| <i>Microcebus murinus</i>       | Gray mouse lemur                       | XM_012782236.1                   | XM_012782142.1                   |          |
| <i>Microtus ochrogaster</i>     | Prairie vole                           | XM_005344400.1                   | XM_005344399.1                   |          |
| <i>Monodelphis domestica</i>    | Gray short-tailed opossum              | XM_001374185.2                   | XM_001374136.2                   |          |
| <i>Mus musculus</i>             | House mouse                            | KU285433                         | KU285441                         |          |
| <i>Mustela putorius furo</i>    | Ferret                                 | XM_004828342.2                   | XM_004828343.2                   |          |
| <i>Myotis lucifugus</i>         | Little brown bat                       | XM_006103820.1                   | XM_006109863.2                   |          |
| <i>Nannospalax galili</i>       | Upper Galilee mountains blind mole rat | XM_008839408.1                   | XM_008839315.1                   |          |
| <i>Nomascus leucogenys</i>      | White-cheeked gibbon                   | KU285434<br>SRX590181, SRX590192 | KU285442<br>SRX590181, SRX590192 |          |
| <i>Ochotona princeps</i>        | American pika                          | XM_004595402.1                   | XM_004595401.1                   |          |
| <i>Octodon degus</i>            | Degu                                   | XM_012515727.1                   | XM_004649001.2                   |          |
| <i>Odobenus rosmarus</i>        | Pacific walrus                         | XM_004395897.2                   | XM_004395896.2                   |          |
| <i>Orcinus orca</i>             | killer whale                           | XM_004286868.2                   | XM_004286872.2                   |          |
| <i>Ornithorhynchus anatinus</i> | Platypus                               | XM_007666896.1                   | XM_007666895.1                   |          |
| <i>Orycteropus afer afer</i>    | Aardvark                               | XM_007938249.1                   | XM_007938250.1                   |          |
| <i>Oryctolagus cuniculus</i>    | Rabbit                                 | XM_008250523.1                   | XM_002722739.2                   |          |
| <i>Otolemur garnettii</i>       | Garnett's greater galago               | XM_003796014.2                   | XM_003804027.2                   |          |
| <i>Ovis aries</i>               | Sheep                                  | XM_012097734.1                   | XM_004023416.2                   |          |
| <i>Pan paniscus</i>             | Bonobo                                 | KU285435                         | KU285443                         | KU285449 |
| <i>Pan troglodytes</i>          | Chimpanzee                             | KU285436                         | KU285444                         | KU285450 |
| <i>Panthera tigris altaica</i>  | Amur tiger                             | XM_007079644.1                   | XM_007099226.1                   |          |

|                                       |                                |                      |                      |                      |
|---------------------------------------|--------------------------------|----------------------|----------------------|----------------------|
| <i>Pantholops hodgsonii</i>           | Chiru                          | XM_005985762.1       | XM_005955269.1       |                      |
| <i>Papio anubis</i>                   | Olive baboon                   | XM_003907319.2       | XM_003907318.2       |                      |
| <i>Peromyscus maniculatus bairdii</i> | Prairie deer mouse             | XM_006999075.1       | XM_006970707.1       |                      |
| <i>Physeter catodon</i>               | Sperm whale                    | XM_007131038.1       | XM_007117167.1       |                      |
| <i>Pongo pygmaeus abelii</i>          | Sumatran orangutan             | KU285437             | KU285445             | KU285451             |
| <i>Propithecus coquereli</i>          | Coquerel's sifaka              | XM_012663442.1       | XM_012663575.1       |                      |
| <i>Pteropus alecto</i>                | Black flying fox               | XM_006927015.1       | XM_006927014.1       |                      |
| <i>Pteropus vampyrus</i>              | Large flying fox               | XM_011355737.1       | XM_011355738.1       |                      |
| <i>Rattus norvegicus</i>              | Norway rat                     | NM_001145334.1       | NM_181476.1          |                      |
| <i>Rhinopithecus roxellana</i>        | Golden snub-nosed monkey       | XM_010368366.1       | XM_010368365.1       |                      |
| <i>Saimiri boliviensis</i>            | Black-capped squirrel monkey   | XM_003932150.2       | XM_003932151.2       |                      |
| <i>Sarcophilus harrisii</i>           | Tasmanian devil                | XM_003761068.1       | XM_003761067.1       |                      |
| <i>Sorex araneus</i>                  | Common shrew                   | XM_012933294.1       | XM_004611156.1       |                      |
| <i>Spermophilus tridecemlineatus</i>  | thirteen-lined ground squirrel | XM_005343026.1       | XM_005343027.1       |                      |
| <i>Sus scrofa</i>                     | Wild boar                      | NM_001145381.1       | AK397813.1           |                      |
| <i>Symphalangus syndactylus</i>       | Siamang                        | KU285438             | KU285446             | KU285452             |
|                                       |                                | SRX590195, SRX590189 | SRX590195, SRX590189 | SRX590195, SRX590189 |
| <i>Tarsius syrichta</i>               | Philippine tarsier             | XM_008050396.1       | XM_008050397.1       |                      |
| <i>Trichechus manatus latirostris</i> | Florida manatee                | XM_004391326.2       | XM_012558036.1       |                      |
| <i>Tupaia chinensis</i>               | Chinese treeshrew              | XM_006149277.1       | XM_006149278.1       |                      |
| <i>Tursiops truncatus</i>             | Common bottlenose dolphin      | XM_004332398.1       | XM_004332393.1       |                      |
| <i>Ursus maritimus</i>                | polar bear                     | XM_008688842.1       | XM_008688841.1       |                      |
| <i>Vicugna pacos</i>                  | Alpaca                         | XM_006220341.1       | XM_006220342.1       |                      |

Zebra fish HCA<sub>1</sub> sequence (NM\_001163292.1) was used as query sequence in discontinuous megablast in a standard nucleotide BLAST for mining orthologous sequences. HCAR sequences of various mammalian species were obtained using the respective mouse ortholog nucleotide sequences (NM\_175520.4, NM\_030701.3) or human HCAR3 (NM\_006018.2) as query sequence in discontinuous megablast in a standard nucleotide BLAST, a Trace Archive Nucleotide BLAST of mammalian trace archives or a Sequence Read Archive Nucleotide BLAST. Trace files of sequences producing significant alignments were downloaded followed by assembly, analysis (using SeqManPro of the DNASTar Lasergene Software Suite for Sequence Analysis 7.1.) and manual proof-reading. Trace identifier, NCBI accession or SRA accession numbers are listed
