# Supplementary material for: Metabolites of lactic acid bacteria present in fermented foods are highly potent agonists of human hydroxycarboxylic acid receptor 3
Source: PubMed Central journal article supplement (PMC6532841; doi:10.1371/journal.pgen.1008145), 2019-05-23
Supplement: pgen.1008145.s010.pdf [file pgen.1008145.s010.pdf]

### Supplementary Table S3

Maximum likelihood estimates of  $d_N/d_S$  ratios ( $\omega$ ) for 88 mammalian HCA<sub>1</sub> and HCA<sub>2</sub> orthologs, for 5 ape HCA<sub>1</sub>, HCA<sub>2</sub> and HCA<sub>3</sub> orthologs and for 5 Hylobatidae HCA<sub>1</sub> and HCA<sub>2</sub> orthologs under different branch-specific models using PAML.

| branch models                                                        | $p$ | l         | $\kappa$ | Estimates of Parameters                                           | hypothesis                                            | $\chi^2$ | P-Value |
|----------------------------------------------------------------------|-----|-----------|----------|-------------------------------------------------------------------|-------------------------------------------------------|----------|---------|
| <b>HCA<sub>1</sub></b>                                               |     |           |          |                                                                   |                                                       |          |         |
| <b>88 mammalian species</b>                                          |     |           |          |                                                                   |                                                       |          |         |
| One ratio: $\omega_0$                                                | 142 | -18285.29 | 4.08     | $\omega_0 = 0.106$                                                |                                                       |          |         |
| Two ratios: $\omega_0, \omega_{\text{Hominidae}}$                    | 143 | -18284.32 | 4.08     | $\omega_0 = 0.105, \omega_{\text{Hominidae}} = 0.169$             | $\omega_0 \neq \omega_{\text{Hominidae}}$             | 1.94     | 0.1637  |
| Two ratios: $\omega_0, \omega_{\text{Hylobatidae}}$                  | 143 | -18284.04 | 4.08     | $\omega_0 = 0.105, \omega_{\text{Hylobatidae}} = 0.233$           | $\omega_0 \neq \omega_{\text{Hylobatidae}}$           | 2.51     | 0.1131  |
| Two ratios: $\omega_0, \omega_{\text{Hominoidea}}$                   | 143 | -18282.81 | 4.09     | $\omega_0 = 0.105, \omega_{\text{Hominoidea}} = 0.189$            | $\omega_0 \neq \omega_{\text{Hominoidea}}$            | 4.97     | 0.0258  |
| <b>HCA<sub>2</sub></b>                                               |     |           |          |                                                                   |                                                       |          |         |
| <b>88 mammalian species</b>                                          |     |           |          |                                                                   |                                                       |          |         |
| One ratio: $\omega_0$                                                | 142 | -18378.75 | 3.43     | $\omega_0 = 0.091$                                                |                                                       |          |         |
| Two ratios: $\omega_0, \omega_{\text{Hominidae}}$                    | 143 | -18378.74 | 3.43     | $\omega_0 = 0.091, \omega_{\text{Hominidae}} = 0.087$             | $\omega_0 \neq \omega_{\text{Hominidae}}$             | 0.02     | 0.8875  |
| Two ratios: $\omega_0, \omega_{\text{Hylobatidae}}$                  | 143 | -18378.73 | 3.43     | $\omega_0 = 0.091, \omega_{\text{Hylobatidae}} = 0.099$           | $\omega_0 \neq \omega_{\text{Hylobatidae}}$           | 0.05     | 0.8231  |
| Two ratios: $\omega_0, \omega_{\text{Hominoidea}}$                   | 143 | -18378.69 | 3.43     | $\omega_0 = 0.091, \omega_{\text{Hominoidea}} = 0.099$            | $\omega_0 \neq \omega_{\text{Hominoidea}}$            | 0.13     | 0.7184  |
| <b>HCA<sub>1</sub>-HCA<sub>2</sub>-HCA<sub>3</sub></b>               |     |           |          |                                                                   |                                                       |          |         |
| <b>5 apes</b>                                                        |     |           |          |                                                                   |                                                       |          |         |
| <b>branch models</b>                                                 |     |           |          |                                                                   |                                                       |          |         |
| One ratio: $\omega_0$                                                | 29  | -3047.70  | 2.32     | $\omega_0 = 0.135$                                                |                                                       |          |         |
| Two ratios:<br>$\omega_{\text{HCA1}}, \omega_{\text{HCA2/HCA3}}$     | 30  | -3045.26  | 2.36     | $\omega_{\text{HCA1}} = 0.095, \omega_{\text{HCA2/HCA3}} = 0.184$ | $\omega_{\text{HCA1}} \neq \omega_{\text{HCA2/HCA3}}$ | 4.88     | 0.0272  |
| Two ratios:<br>$\omega_{\text{HCA2}}, \omega_{\text{HCA1/HCA3}}$     | 30  | -3047.70  | 2.32     | $\omega_{\text{HCA2}} = 0.131, \omega_{\text{HCA1/HCA3}} = 0.137$ | $\omega_{\text{HCA2}} \neq \omega_{\text{HCA1/HCA3}}$ | 0.01     | 0.9203  |
| Two ratios:<br>$\omega_{\text{HCA3}}, \omega_{\text{HCA1/HCA2}}$     | 30  | -3043.99  | 2.36     | $\omega_{\text{HCA3}} = 0.257, \omega_{\text{HCA1/HCA2}} = 0.103$ | $\omega_{\text{HCA3}} \neq \omega_{\text{HCA1/HCA2}}$ | 7.43     | 0.0064  |
| Two ratios:<br>$\omega_{\text{HCA3}} = 1, \omega_{\text{HCA1/HCA2}}$ | 29  | -3056.45  | 2.49     | $\omega_{\text{HCA3}} = 1, \omega_{\text{HCA1/HCA2}} = 0.104$     | $\omega_{\text{HCA3}} \neq 1$                         | 24.92    | 0.0001  |
| Two ratios:                                                          | 30  | -3045.02  | 2.33     | $\omega_0 = 0.124, \omega_{\text{siamangHCA2/HCA3}} = 0.775$      | $\omega_0 \neq \omega_{\text{siamangHCA2/HCA3}}$      | 5.36     | 0.0206  |

|                                                                                                                 |    |          |      |                                                          |                                           |      |        |
|-----------------------------------------------------------------------------------------------------------------|----|----------|------|----------------------------------------------------------|-------------------------------------------|------|--------|
| $\omega_0, \omega_{\text{siamangHCA2/HCA3}}$<br>Two ratios:<br>$\omega_0, \omega_{\text{siamangHCA2/HCA3}} = 1$ | 29 | -3045.07 | 2.33 | $\omega_0 = 0.124, \omega_{\text{siamangHCA2/HCA3}} = 1$ | $\omega_{\text{siamangHCA2/HCA3}} \neq 1$ | 0.09 | 0.7642 |
| <b>HCA<sub>1</sub></b><br><b>5 gibbons</b>                                                                      |    |          |      |                                                          |                                           |      |        |
| One ratio: $\omega_0$                                                                                           | 10 | -1467.86 | 3.03 | $\omega_0 = 0.207$                                       |                                           |      |        |
| Two ratios: $\omega_0, \omega_{\text{siamang}}$                                                                 | 11 | -1467.40 | 3.03 | $\omega_0 = 0.138, \omega_{\text{siamang}} = 0.415$      | $\omega_0 \neq \omega_{\text{siamang}}$   | 0.93 | 0.3349 |
| Two ratios: $\omega_0, \omega_{\text{siamang}} = 1$                                                             | 10 | -1467.82 | 3.17 | $\omega_0 = 0.105, \omega_{\text{siamang}} = 1$          | $\omega_{\text{siamang}} \neq 1$          | 0.84 | 0.3594 |
| <b>HCA<sub>2</sub></b><br><b>5 gibbons</b>                                                                      |    |          |      |                                                          |                                           |      |        |
| One ratio: $\omega_0$                                                                                           | 8  | -1597.26 | 2.42 | $\omega_0 = 0.114$                                       |                                           |      |        |
| Two ratios: $\omega_0, \omega_{\text{siamang}}$                                                                 | 9  | -1593.68 | 2.42 | $\omega_0 = 0.048, \omega_{\text{siamang}} = 0.643$      | $\omega_0 \neq \omega_{\text{siamang}}$   | 7.16 | 0.0075 |
| Two ratios: $\omega_0, \omega_{\text{siamang}} = 1$                                                             | 8  | -1593.81 | 2.46 | $\omega_0 = 0.048, \omega_{\text{siamang}} = 1$          | $\omega_{\text{siamang}} \neq 1$          | 0.26 | 0.6101 |

<sup>a</sup> LRT tests were performed between nested models.  $\omega$ ,  $d_N/d_S$  ratio;  $\omega_0$ , indicates  $\omega$  of all other branches (the ones that are not specifically labeled in a model).  $p$ , number of free parameters;  $\ell$ , Log likelihood;  $\kappa$ , transition to transversion rate ratio; \* indicates  $P > 0.95$ ; \*\* indicates  $P > 0.99$ ; corresponding tree in NEWICK notation: ((((((Hsapi3,Ptrog3),Ggori3),Ppygm3),Ssynd3),(((Hsapi2,Ptrog2),Ggori2),Ppygm2),Ssynd2)),(((Hsapi1,Ptrog1),Ggori1),Ppygm1),Ssynd1)); Hsapi: Homo sapiens, Ptrog: Pan troglodytes, Ggori: Gorilla gorilla, Ppygm: Pongo pygmaeus, Ssynd: Symphalangus syndactylus; corresponding tree in NEWICK notation: ((hoolock-gibbon1,silvery-gibbon1,(pileated-gibbon1)),siamang1,white-cheeked-gibbon1); ((hoolock-gibbon2,silvery-gibbon2,(pileated-gibbon2)),siamang2,white-cheeked-gibbon2);
