# Supplementary material for: Metabolites of lactic acid bacteria present in fermented foods are highly potent agonists of human hydroxycarboxylic acid receptor 3
Source: PubMed Central journal article supplement (PMC6532841; doi:10.1371/journal.pgen.1008145), 2019-05-23
Supplement: pgen.1008145.s011.pdf [file pgen.1008145.s011.pdf]

### Supplementary Table S4

Bacterial species carrying genes for EC 1.1.1.28 that were detected in human gut microbiota of the curated Metagenomic Dataset

| UniRefID   | taxonomy                                                                |                  | taxID  | RepID            | annotated Function                                                      | members |
|------------|-------------------------------------------------------------------------|------------------|--------|------------------|-------------------------------------------------------------------------|---------|
| A4SHJ2     | <i>Aeromonas salmonicida</i><br>(strain A449)                           | ldhA             | 645    | A4SHJ2_AERS4     | D-lactate dehydrogenase                                                 | 4       |
| D4IK03     | <i>Alistipes shahii</i> WAL 8301                                        | AL1_06570        | 717959 | D4IK03_9BACT     | Lactate dehydrogenase and related dehydrogenases                        | 1       |
| Q5HLA0     | <i>Staphylococcus epidermidis</i> (strain ATCC 35984 / RP62A)           | ldhD             | 1385   | LDHD_STAEQ       | D-lactate dehydrogenase                                                 | 8       |
| A0A0U0PXB9 | <i>Streptococcus pneumoniae</i>                                         | ldhA_4           | 91061  | A0A0U0PXB9_STREE | D-lactate dehydrogenase                                                 | 3       |
| R7NW57     | <i>Bacteroides vulgatus</i><br>CAG:6                                    | BN728_00129      | 816    | R7NW57_9BACE     | Dehydrogenase                                                           | 3       |
| A0A173R861 | <i>Blautia hydrogenotrophica</i>                                        | ldhA             | 572511 | A0A173R861_9FIRM | D-lactate dehydrogenase                                                 | 4       |
| D4LSS4     | <i>Blautia obeum</i> A2-162                                             | CK5_25280        | 657314 | D4LSS4_9FIRM     | Lactate dehydrogenase and related dehydrogenases                        | 1       |
| A0A0R2J7L9 | <i>Carnobacterium maltaromaticum</i>                                    | IV76_GL002156    | 2751   | A0A0R2J7L9_CARML | D-isomer specific 2-hydroxyacid dehydrogenase, catalytic domain protein | 3       |
| D4LHM9     | <i>Ruminococcus</i> sp. SR1/5                                           | CK1_11640        | 186802 | D4LHM9_9FIRM     | Lactate dehydrogenase and related dehydrogenases                        | 2       |
| A0A1E7S4G9 | <i>Butyribacterium methylotrophicum</i>                                 | ldhA             | 186802 | A0A1E7S4G9_BUTME | D-lactate dehydrogenase                                                 | 3       |
| A0A174AVH0 | <i>Blautia obeum</i>                                                    | ldhA             | 186802 | A0A174AVH0_9FIRM | D-lactate dehydrogenase                                                 | 4       |
| A5ZQ76     | <i>Blautia obeum</i> ATCC 29174                                         | pdxB             | 186802 | A5ZQ76_9FIRM     | 4-phosphoerythronate dehydrogenase                                      | 4       |
| D5HDL3     | <i>Coprococcus</i> sp. ART55/1                                          | CCU_13850        | 33042  | D5HDL3_9FIRM     | Lactate dehydrogenase and related dehydrogenases                        | 3       |
| C9Y542     | <i>Cronobacter turicensis</i><br>(strain DSM 18703 / LMG 23827 / z3032) | ldhA             | 413502 | C9Y542_CROTZ     | D-lactate dehydrogenase                                                 | 2       |
| G9Y1R0     | <i>Hafnia alvei</i> ATCC 51873                                          | HMPREF0454_00477 | 91347  | G9Y1R0_HAFAL     | D-lactate dehydrogenase                                                 | 4       |
| R6H4R1     | <i>Blautia</i> sp. CAG:52                                               | BN690_00348      | 765820 | R6H4R1_9FIRM     | Uncharacterized protein                                                 | 2       |

|            |                                                                           |             |         |                  |                                                                      |    |
|------------|---------------------------------------------------------------------------|-------------|---------|------------------|----------------------------------------------------------------------|----|
| R6TCX2     | <i>Ruminococcus sp.</i><br>CAG:57                                         | BN714_00041 | 129701  | R6TCX2_9FIRM     | D-lactate dehydrogenase                                              | 2  |
| A0A175AAG2 | <i>Clostridium innocuum</i>                                               | ldhA        | 128827  | A0A175AAG2_CLOIN | D-isomer specific 2-hydroxyacid dehydrogenase<br>NAD-binding subunit | 3  |
| A0A174Z3P7 | <i>[Eubacterium] eligens</i>                                              | ldhA        | 1730    | A0A174Z3P7_9FIRM | D-lactate dehydrogenase                                              | 3  |
| A0A1S8HW56 | <i>Enterococcus faecium</i><br>( <i>Streptococcus faecium</i> )           | B1P95_07035 | 1239    | A0A1S8HW56_ENTFC | Lactate dehydrogenase                                                | 10 |
| R6BRE7     | <i>Firmicutes bacterium</i><br>CAG:56                                     | BN708_00872 | 1239    | R6BRE7_9FIRM     | D-lactate dehydrogenase                                              | 2  |
| Q7P6Z0     | <i>Fusobacterium nucleatum</i><br>subsp. <i>vincentii</i> ATCC<br>49256   | FNV1748     | 848     | Q7P6Z0_FUSNV     | D-lactate dehydrogenase                                              | 7  |
| E5BHL4     | <i>Fusobacterium</i><br><i>gonidiaformans</i> 3-1-5R                      | ldhA        | 848     | E5BHL4_9FUSO     | D-lactate dehydrogenase                                              | 2  |
| A5TXC5     | <i>Fusobacterium nucleatum</i><br>subsp. <i>polymorphum</i><br>ATCC 10953 | FNP_1778    | 851     | A5TXC5_FUSNP     | D-lactate dehydrogenase                                              | 2  |
| A0A0A3B643 | <i>Gallibacterium anatis</i>                                              | CF557_11150 | 155493  | A0A0A3B643_9PAST | 2-hydroxyacid dehydrogenase                                          | 7  |
| P52643     | <i>Escherichia coli</i> (strain<br>K12)                                   | ldhA        | 1236    | LDHD_ECOLI       | D-lactate dehydrogenase                                              | 28 |
| C5NVX3     | <i>Gemella haemolysans</i><br>ATCC 10379                                  | ldhA        | 546270  | C5NVX3_9BACL     | D-lactate dehydrogenase                                              | 1  |
| I2NIP6     | <i>Haemophilus</i><br><i>paraphrohaemolyticus</i><br>HK411                | ldhA        | 1095743 | I2NIP6_9PAST     | D-lactate dehydrogenase, fermentative                                | 1  |
| U4RME6     | <i>Haemophilus parasuis</i><br>MN-H                                       | ldhA        | 1275967 | U4RME6_HAEPR     | D-lactate dehydrogenase                                              | 1  |
| D0Z839     | <i>Edwardsiella tarda</i> (strain<br>EIB202)                              | ldhA        | 1903412 | D0Z839_EDWTE     | D-lactate dehydrogenase                                              | 4  |
| A0A087FL13 | <i>Klebsiella variicola</i>                                               | ldhA        | 570     | A0A087FL13_KLEVA | 2-hydroxyacid dehydrogenase                                          | 4  |
| A0A2D2GQF3 | <i>Klebsiella pneumoniae</i>                                              | CTI55_14035 | 573     | A0A2D2GQF3_KLEPN | 2-hydroxyacid dehydrogenase                                          | 3  |
| A0A0R2FDE7 | <i>Weissella confusa</i><br>( <i>Lactobacillus confusus</i> )             | BKY29_07830 | 186826  | A0A0R2FDE7_WEICO | D-lactate dehydrogenase                                              | 3  |
| C2EUK0     | <i>Lactobacillus vaginalis</i><br>DSM 5837 = ATCC<br>49540                | ldhA        | 1578    | C2EUK0_9LACO     | D-lactate dehydrogenase                                              | 2  |

|            |                                                                                 |                   |        |                  |                                      |   |
|------------|---------------------------------------------------------------------------------|-------------------|--------|------------------|--------------------------------------|---|
| A0A0R2E8D7 | <i>Lactobacillus fermentum</i>                                                  | ldhA              | 1578   | A0A0R2E8D7_LACFE | D-lactate dehydrogenase              | 3 |
| A4GXJ0     | <i>Lactobacillus reuteri</i>                                                    | ldhD3             | 1578   | A4GXJ0_LACRE     | D-lactate dehydrogenase              | 4 |
| P17584     | <i>Lactobacillus paracasei</i>                                                  |                   | 1578   | DHD2_LACPA       | D-2-hydroxyisocaproate dehydrogenase | 8 |
| Q88VJ2     | <i>Lactobacillus plantarum</i><br>(strain ATCC BAA-793 /<br>NCIMB 8826 / WCFS1) | ldhD              | 1578   | LDHD_LACPL       | D-lactate dehydrogenase              | 9 |
| M5AXQ3     | <i>Lactobacillus brevis</i><br>KB290                                            | LVISKB_0201       | 1580   | M5AXQ3_LACBR     | D-lactate dehydrogenase              | 5 |
| J9W550     | <i>Lactobacillus buchneri</i><br>CD034                                          | ldhD2             | 1581   | J9W550_LACBU     | D-lactate dehydrogenase              | 2 |
| P26297     | <i>Lactobacillus delbrueckii</i><br>subsp. <i>bulgaricus</i>                    | ldhA              | 1585   | LDHD_LACDA       | D-lactate dehydrogenase              | 2 |
| A0A1D7ZUQ4 | <i>Lactobacillus fermentum</i>                                                  | LACFE_CDS01<br>07 | 1613   | A0A1D7ZUQ4_LACFE | D-2-hydroxyisocaproate dehydrogenase | 6 |
| P30901     | <i>Lactobacillus helveticus</i><br>( <i>Lactobacillus suntoryeus</i> )          |                   | 1587   | LDHD_LACHE       | D-lactate dehydrogenase              | 6 |
| D6S2A4     | <i>Lactobacillus jensenii</i> JV-<br>V16                                        | ldhA              | 525329 | D6S2A4_9LACO     | D-lactate dehydrogenase              | 1 |
| E3C8P4     | <i>Lactobacillus oris</i> PB013-<br>T2-3                                        | ldhA              | 908339 | E3C8P4_9LACO     | D-lactate dehydrogenase              | 1 |
| A0A143PXG9 | <i>Lactobacillus reuteri</i>                                                    | ADV92_02125       | 1598   | A0A143PXG9_LACRE | Lactate dehydrogenase                | 4 |
| F5VBS9     | <i>Lactobacillus salivarius</i><br>NIAS840                                      | NIAS840_0020<br>8 | 1624   | F5VBS9_9LACO     | D-lactate dehydrogenase              | 2 |
| A0A1V9SKC4 | <i>Lactobacillus salivarius</i>                                                 | B6U37_09610       | 1624   | A0A1V9SKC4_9LACO | Lactate dehydrogenase                | 2 |
| G2KTX9     | <i>Lactobacillus</i><br><i>sanfranciscensis</i> (strain<br>TMW 1.1304)          | ldhD              | 1625   | G2KTX9_LACSM     | D-lactate dehydrogenase              | 2 |
| G2KUM4     | <i>Lactobacillus</i><br><i>sanfranciscensis</i> (strain<br>TMW 1.1304)          | LSA_12510         | 714313 | G2KUM4_LACSM     | D-lactate dehydrogenase              | 1 |
| H1WTC8     | <i>Leuconostoc citreum</i><br>LBAE C10                                          | ldhA              | 33964  | H1WTC8_LEUCI     | D-lactate dehydrogenase              | 2 |
| B1MW55     | <i>Leuconostoc citreum</i><br>(strain KM20)                                     | ddh               | 349519 | B1MW55_LEUCK     | Lactate dehydrogenase                | 1 |
| B1MXH0     | <i>Leuconostoc citreum</i><br>(strain KM20)                                     | ldhD              | 349519 | B1MXH0_LEUCK     | D-lactate dehydrogenase              | 1 |

|            |                                                                                                                                                    |                    |         |                  |                                     |   |
|------------|----------------------------------------------------------------------------------------------------------------------------------------------------|--------------------|---------|------------------|-------------------------------------|---|
| P51011     | <i>Leuconostoc mesenteroides</i> subsp. <i>cremoris</i>                                                                                            |                    | 33965   | LDHD_LEUMC       | D-lactate dehydrogenase             | 1 |
| M9SCZ3     | <i>Methanomethylophilus alvus</i> (strain Mx1201)                                                                                                  | MMALV_05640        | 1236689 | M9SCZ3_METAX     | D-lactate dehydrogenase             | 1 |
| J7SK16     | <i>Morganella morganii</i> subsp. <i>morganii</i> KT                                                                                               | MU9_2111           | 582     | J7SK16_MORMO     | D-lactate dehydrogenase             | 4 |
| B4RN51     | <i>Neisseria gonorrhoeae</i> (strain NCCP11945)                                                                                                    | NGK_1561           | 485     | B4RN51_NEIG2     | D-lactate dehydrogenase             | 4 |
| F9Z6L8     | <i>Odoribacter splanchnicus</i> (strain ATCC 29572 / DSM 20712 / CIP 104287 / JCM 15291 / NCTC 10825 / 1651/6) ( <i>Bacteroides splanchnicus</i> ) | Odosp_0571         | 283168  | F9Z6L8_ODOSD     | D-lactate dehydrogenase             | 2 |
| A0A0A1SAC7 | <i>Paenibacillus sordellii</i> ( <i>Clostridium sordellii</i> )                                                                                    | ldhA               | 1505    | A0A0A1SAC7_PAESO | D-lactate dehydrogenase             | 3 |
| T4VW16     | <i>Paraclostridium bif fermentans</i> ATCC 19299                                                                                                   | ldhD               | 1233170 | T4VW16_PARBF     | D-lactate dehydrogenase             | 1 |
| Q59642     | <i>Pediococcus acidilactici</i>                                                                                                                    | ldhD               | 1254    | LDHD_PEDAC       | D-lactate/D-glycerate dehydrogenase | 1 |
| A0A1A9AXK2 | <i>Plesiomonas shigelloides</i> ( <i>Aeromonas shigelloides</i> )                                                                                  | ldhA               | 703     | A0A1A9AXK2_PLESH | D-lactate dehydrogenase             | 2 |
| Z4WUP3     | <i>Porphyromonas catoniae</i> ATCC 51270                                                                                                           | ldhA               | 887901  | Z4WUP3_9PORP     | D-lactate dehydrogenase LdhA        | 1 |
| A0A1H9E2A1 | <i>Prevotella bryantii</i> B14                                                                                                                     | SAMN05444375_10698 | 752555  | A0A1H9E2A1_PREBR | D-lactate dehydrogenase             | 2 |
| F0H7X4     | <i>Prevotella denticola</i> CRIS 18C-A                                                                                                             | ldhA               | 28129   | F0H7X4_9BACT     | D-lactate dehydrogenase             | 2 |
| F0H9I0     | <i>Prevotella denticola</i> CRIS 18C-A                                                                                                             | ldhA               | 28129   | F0H9I0_9BACT     | D-lactate dehydrogenase             | 3 |
| F8N944     | <i>Prevotella multisaccharivorax</i> DSM 17128                                                                                                     | Premu_1191         | 688246  | F8N944_9BACT     | D-lactate dehydrogenase             | 1 |
| D3IMR2     | <i>Prevotella</i> sp. oral taxon 317 str. F0108                                                                                                    | ldhA               | 575615  | D3IMR2_9BACT     | D-lactate dehydrogenase             | 1 |
| A0A1Z1SX41 | <i>Proteus mirabilis</i>                                                                                                                           | AM402_12865        | 583     | A0A1Z1SX41_PROMI | 2-hydroxyacid dehydrogenase         | 3 |

|                                                                                                         |                                                                       |               |         |                  |                                                                         |   |
|---------------------------------------------------------------------------------------------------------|-----------------------------------------------------------------------|---------------|---------|------------------|-------------------------------------------------------------------------|---|
| K8WA49                                                                                                  | <i>Providencia sneebia</i> DSM 19967                                  | OO7_09120     | 1141660 | K8WA49_9GAMM     | D-lactate dehydrogenase                                                 | 1 |
| V7D6I6                                                                                                  | <i>Pseudomonas taiwanensis</i> SJ9                                    | O164_20940    | 286     | V7D6I6_9PSED     | D-lactate dehydrogenase                                                 | 3 |
| A0A0S4V152                                                                                              | <i>Ralstonia solanacearum</i> ( <i>Pseudomonas solanacearum</i> )     | ldhA          | 48736   | A0A0S4V152_RALSL | Fermentative D-lactate dehydrogenase, NAD-dependent                     | 4 |
| I6H5A7                                                                                                  | <i>Shigella flexneri</i> 1235-66                                      | SF123566_2205 | 766154  | I6H5A7_SHIFL     | D-lactate dehydrogenase (combined with I6H5A8)                          | 1 |
| Q6G6F1                                                                                                  | <i>Staphylococcus aureus</i> (strain MSSA476)                         | ldhD          | 1280    | LDHD_STAAS       | D-lactate dehydrogenase                                                 | 4 |
| Q8E6A9                                                                                                  | <i>Streptococcus agalactiae</i> serotype III (strain NEM316)          | ldhD          | 1311    | LDHD_STRA3       | D-lactate dehydrogenase                                                 | 7 |
| A0A1U0IBM9                                                                                              | <i>Mycobacterium abscessus</i> subsp. <i>abscessus</i>                | ldhD          | 1783272 | A0A1U0IBM9_9MYCO | D-3-phosphoglycerate dehydrogenase (SerA)                               | 5 |
| F2NY74                                                                                                  | <i>Treponema succinifaciens</i> (strain ATCC 33096 / DSM 2489 / 6091) | Tresu_1183    | 869209  | F2NY74_TRES6     | D-lactate dehydrogenase                                                 | 1 |
| A0A173TYG0                                                                                              | <i>Turicibacter sanguinis</i>                                         | ldhA          | 154288  | A0A173TYG0_9FIRM | D-lactate dehydrogenase                                                 | 2 |
| A0A1C5X6H7                                                                                              | uncultured <i>Clostridium</i> sp.                                     | ldhA_2        |         | A0A1C5X6H7_9CLOT | D-lactate dehydrogenase                                                 | 2 |
| F4N5A3                                                                                                  | <i>Yersinia enterocolitica</i> W22703                                 | ldhA          | 913028  | F4N5A3_YEREN     | D-lactate dehydrogenase                                                 | 1 |
| <i>sequences which were not included in tree but nevertheless detected in human microbiome data set</i> |                                                                       |               |         |                  |                                                                         |   |
| A0A015PCZ5                                                                                              | <i>Bacteroides</i>                                                    | M080_5071     | 816     | A0A015PCZ5_BACFG | D-isomer specific 2-hydroxyacid dehydrogenase, catalytic domain protein | 3 |
| D1ND28                                                                                                  | <i>Haemophilus influenzae</i> HK1212                                  | dld           | 456482  | D1ND28_HAEIF     | D-lactate dehydrogenase                                                 | 1 |
| W1H0L2                                                                                                  | <i>Klebsiella pneumoniae</i>                                          |               | 573     | W1H0L2_KLEPN     | D-lactate dehydrogenase                                                 | 3 |
| W1DSP9                                                                                                  | <i>Klebsiella pneumoniae</i> IS43                                     |               | 1432552 | W1DSP9_KLEPN     | D-lactate dehydrogenase                                                 | 1 |
| W1EEI5                                                                                                  | <i>Klebsiella pneumoniae</i> IS53                                     |               | 1432554 | W1EEI5_KLEPN     | D-lactate dehydrogenase                                                 | 1 |
| W1H2U2                                                                                                  | <i>Klebsiella pneumoniae</i> ISC21                                    |               | 1432558 | W1H2U2_KLEPN     | D-lactate dehydrogenase                                                 | 1 |

|            |                                                                                                |               |         |                  |                                           |    |
|------------|------------------------------------------------------------------------------------------------|---------------|---------|------------------|-------------------------------------------|----|
| A0A0U3DDR3 | <i>Lactobacillus delbrueckii</i><br><i>subsp. bulgaricus</i>                                   | AT236_00768   | 1585    | A0A0U3DDR3_LACDE | D-hydroxyisocaproate dehydrogenase        | 3  |
| T0D2K8     | <i>Paeniclostridium sordellii</i><br><i>ATCC 9714</i>                                          | ldhD          | 1292036 | T0D2K8_PAESO     | D-lactate dehydrogenase                   | 1  |
| P06149     | <i>Proteobacteria</i>                                                                          | dld           | 1224    | DLD_ECOLI        | Quinone-dependent D-lactate dehydrogenase | 21 |
| C0B123     | <i>Proteus penneri</i> <i>ATCC</i><br><i>35198</i>                                             | dld           | 471881  | C0B123_9GAMM     | D-lactate dehydrogenase                   | 1  |
| I6H5A8     | <i>Shigella flexneri</i> <i>1235-66</i>                                                        | SF123566_2206 | 766154  | I6H5A8_SHIFL     | D-lactate dehydrogenase domain protein    | 1  |
| K4Q9L2     | <i>Streptococcus</i><br><i>dysgalactiae</i> <i>subsp.</i><br><i>equisimilis</i> <i>AC-2713</i> | ddh           | 759913  | K4Q9L2_STREQ     | D-lactate dehydrogenase                   | 1  |

EC 1.1.1.28 is D-lactate dehydrogenase, the enzyme catalyzing the conversion between D-lactate and pyruvate. For *Lactobacillus plantarum* SK002, it has been shown that this enzyme also can also convert phenylpyruvate to D-phenyllactate. The BRENDA database [46] also lists this activity for *L. pentosus* and *L. jensenii*, in addition to *Pediococcus acidilactici* and *P. pentosaceus*. From the current literature it is uncertain whether all D-lactate dehydrogenases have a similar potential to also produce phenyllactate or whether this is a specific trait of certain Lactobacillaceae enzymes. UniProtKB, on the other hand, lists 1,809 entries with the EC 1.1.1.28 annotation. These comprise 1,443 unique sequences (UniRef100). In addition to the annotated genes, UniProtKB lists 481 proteins with identical sequences, which are not annotated as such. These total of 2,290 proteins are found in 1,643 different organisms, including mostly bacteria, 13 archaea and 15 eukaryotic organisms, such as fungi, amoebzoa, and diatoms. Metagenomic data from 1,885 human stool samples from the curated Metagenomic Dataset (<https://github.com/waldrnlab/curatedMetagenomicData> [47]) were searched for the 1,443 (EC 1.1.1.28)-related UniRef100 entries. 92 of the UniProt entries for EC 1.1.1.28 were found in at least one human microbiome data set. These 92 unique sequences represent 271 different UniProtKB proteins that are found in different strains of 107 bacterial species and insufficiently described bacteria.
