# Supplementary material for: Metabolites of lactic acid bacteria present in fermented foods are highly potent agonists of human hydroxycarboxylic acid receptor 3
Source: PubMed Central journal article supplement (PMC6532841; doi:10.1371/journal.pgen.1008145), 2019-05-23
Supplement: pgen.1008145.s012.pdf [file pgen.1008145.s012.pdf]

### Supplementary Table S5

Testing of PLA-containing human urine and plasma samples on transiently with human HCA<sub>2</sub> or HCA<sub>3</sub> or empty vector transfected CHO-K1 cells

|                                              |          | HCA <sub>2</sub>              | HCA <sub>3</sub>              | empty vector                  | HCA <sub>2</sub> (PTX)        | HCA <sub>3</sub> (PTX)        | empty vector (PTX)            |
|----------------------------------------------|----------|-------------------------------|-------------------------------|-------------------------------|-------------------------------|-------------------------------|-------------------------------|
| dilution                                     | PLA [nM] | % of forskolin stimulated w/o | % of forskolin stimulated w/o | % of forskolin stimulated w/o | % of forskolin stimulated w/o | % of forskolin stimulated w/o | % of forskolin stimulated w/o |
| <b>urine (80 min containing 285 μM PLA)</b>  |          |                               |                               |                               |                               |                               |                               |
| 1:20,480                                     | 13.9     | 82.3 ± 3.3                    | 91.8 ± 3.6                    | 96.4 ± 5.3                    | 92.1 ± 6.3                    | 97.7 ± 4.2                    | 100.6 ± 2.7                   |
| 1:10,240                                     | 27.8     | 99.3 ± 5.5                    | 84.8 ± 4.1                    | 96.9 ± 5.0                    | 92.4 ± 8.9                    | 95.3 ± 2.4                    | 95.4 ± 0.5                    |
| 1:5,120                                      | 55.7     | 95.6 ± 8.0                    | 81.1 ± 3.5                    | 95.1 ± 4.4                    | 93.5 ± 4.6                    | 92.3 ± 2.8                    | 97.9 ± 3.6                    |
| 1:2,560                                      | 111.3    | 104.9 ± 1.7                   | 68.8 ± 1.8                    | 98.4 ± 4.0                    | 91.1 ± 8.6                    | 87.9 ± 0.7                    | 96.7 ± 3.5                    |
| 1:1,280                                      | 222.7    | 93.3 ± 1.4                    | 65.2 ± 0.6                    | 91.7 ± 1.5                    | 88.7 ± 4.8                    | 86.4 ± 0.5                    | 96.8 ± 6.5                    |
| 1:640                                        | 445.3    | 92.2 ± 5.9                    | 56.0 ± 2.4                    | 86.8 ± 3.3                    | 82.1 ± 2.0                    | 85.4 ± 3.8                    | 99.7 ± 6.3                    |
| 1:320                                        | 890.6    | 85.5 ± 2.7                    | 48.4 ± 3.6                    | 80.5 ± 2.3                    | 87.7 ± 5.2                    | 86.4 ± 2.9                    | 93.4 ± 5.4                    |
| 1:160                                        | 1781.3   | 72.1 ± 4.5                    | 43.3 ± 4.0                    | 74.1 ± 2.9                    | 82.3 ± 5.9                    | 76.5 ± 5.9                    | 89.0 ± 9.6                    |
| 1:80                                         | 3562.5   | 54.8 ± 2.3                    | 37.4 ± 2.8                    | 66.6 ± 2.7                    | 83.3 ± 9.53                   | 75.7 ± 7.0                    | 84.3 ± 9.5                    |
| <b>urine (340 min containing 33 μM PLA)</b>  |          |                               |                               |                               |                               |                               |                               |
| 1:1,280                                      | 25.8     | 91.2 ± 6.8                    | 87.4 ± 8.8                    | 81.7 ± 2.5                    | n.d.                          | n.d.                          | n.d.                          |
| 1:640                                        | 51.6     | 87.1 ± 0.8                    | 74.5 ± 2.0                    | 80.1 ± 4.7                    | n.d.                          | n.d.                          | n.d.                          |
| 1:320                                        | 103.1    | 75.5 ± 2.4                    | 58.7 ± 1.9                    | 71.2 ± 2.0                    | n.d.                          | n.d.                          | n.d.                          |
| 1:160                                        | 206.3    | 62.2 ± 4.0                    | 52.8 ± 0.1                    | 60.5 ± 4.5                    | n.d.                          | n.d.                          | n.d.                          |
| <b>urine (510 min containing 3.4 μM PLA)</b> |          |                               |                               |                               |                               |                               |                               |
| 1:1,280                                      | 2.7      | 94.6 ± 5.0                    | 85.9 ± 4.2                    | 82.4 ± 9.3                    | n.d.                          | n.d.                          | n.d.                          |
| 1:640                                        | 5.4      | 87.4 ± 0.5                    | 77.3 ± 1.1                    | 70.6 ± 2.1                    | n.d.                          | n.d.                          | n.d.                          |
| 1:320                                        | 10.8     | 85.0 ± 5.70                   | 75.9 ± 7.0                    | 76.1 ± 5.2                    | n.d.                          | n.d.                          | n.d.                          |
| 1:160                                        | 21.5     | 76.9 ± 3.0                    | 67.5 ± 7.5                    | 72.0 ± 0.7                    | n.d.                          | n.d.                          | n.d.                          |
| <b>plasma (30 min containing 23 μM PLA)</b>  |          |                               |                               |                               |                               |                               |                               |
| 1:20,480                                     | 1.1      | 96.2 ± 5.9                    | 96.0 ± 0.3                    | 99.3 ± 0.9                    | 106.3 ± 3.0                   | 102.5 ± 2.4                   | 101.4 ± 0.1                   |
| 1:10,240                                     | 2.2      | 102.9 ± 2.8                   | 90.2 ± 2.5                    | 101.1 ± 2.7                   | 101.5 ± 2.5                   | 99.5 ± 4.1                    | 95.7 ± 0.5                    |
| 1:5,120                                      | 4.5      | 97.8 ± 0.1                    | 84.4 ± 3.9                    | 101.0 ± 0.5                   | 97.6 ± 3.1                    | 94.9 ± 0.1                    | 91.0 ± 4.8                    |
| 1:2,560                                      | 9.0      | 104.4 ± 5.1                   | 88.0 ± 1.9                    | 109.1 ± 5.6                   | 102.0 ± 3.2                   | 96.5 ± 4.0                    | 98.6 ± 4.5                    |
| 1:1,280                                      | 18.0     | 102.0 ± 9.3                   | 72.8 ± 2.5                    | 102.5 ± 1.3                   | 99.4 ± 4.5                    | 94.5 ± 2.3                    | 95.7 ± 0.2                    |
| 1:640                                        | 35.9     | 92.0 ± 3.1                    | 67.1 ± 1.8                    | 93.2 ± 1.6                    | 100.2 ± 1.7                   | 90.9 ± 0.5                    | 97.5 ± 2.3                    |
| 1:320                                        | 71.9     | 79.5 ± 1.2                    | 57.6 ± 6.8                    | 85.7 ± 3.5                    | 98.9 ± 3.1                    | 95.7 ± 1.3                    | 101.2 ± 2.8                   |
| 1:160                                        | 143.8    | 67.4 ± 4.7                    | 47.1 ± 3.5                    | 73.0 ± 0.6                    | 95.5 ± 4.4                    | 91.7 ± 6.0                    | 98.0 ± 4.3                    |
| 1:80                                         | 287.5    | 47.8 ± 4.1                    | 33.3 ± 0.9                    | 58.9 ± 3.6                    | 88.0 ± 5.8                    | 87.1 ± 4.3                    | 95.8 ± 0.3                    |

| <b>plasma (0 min containing 0.42 <math>\mu</math>M PLA)</b>               |      |                |                |                |                 |                 |                 |
|---------------------------------------------------------------------------|------|----------------|----------------|----------------|-----------------|-----------------|-----------------|
| 1:320                                                                     | 1.3  | 75.1 $\pm$ 4.7 | 90.4 $\pm$ 1.0 | 91.0 $\pm$ 0.1 | n.d.            | n.d.            | n.d.            |
| 1:160                                                                     | 2.6  | 60.4 $\pm$ 6.8 | 70.1 $\pm$ 0.6 | 69.8 $\pm$ 1.8 | n.d.            | n.d.            | n.d.            |
| <b>plasma (60 min containing 8.9 <math>\mu</math>M PLA)</b>               |      |                |                |                |                 |                 |                 |
| 1:320                                                                     | 27.8 | 80.1 $\pm$ 1.2 | 73.5 $\pm$ 5.4 | 83.9 $\pm$ 6.2 | n.d.            | n.d.            | n.d.            |
| 1:160                                                                     | 55.6 | 75.4 $\pm$ 0.7 | 59.3 $\pm$ 3.2 | 67.4 $\pm$ 3.7 | n.d.            | n.d.            | n.d.            |
| <b>plasma (120 min containing 2.9 <math>\mu</math>M PLA)</b>              |      |                |                |                |                 |                 |                 |
| 1:320                                                                     | 9.1  | 76.8 $\pm$ 0.8 | 77.6 $\pm$ 6.3 | 82.4 $\pm$ 4.7 | n.d.            | n.d.            | n.d.            |
| 1:160                                                                     | 18.1 | 67.7 $\pm$ 4.2 | 61.5 $\pm$ 5.9 | 66.4 $\pm$ 4.7 | n.d.            | n.d.            | n.d.            |
| <b>plasma (180 min containing 0.8 <math>\mu</math>M PLA)</b>              |      |                |                |                |                 |                 |                 |
| 1:320                                                                     | 2.5  | 78.1 $\pm$ 5.1 | 80.4 $\pm$ 2.3 | 88.6 $\pm$ 7.9 | n.d.            | n.d.            | n.d.            |
| 1:160                                                                     | 5.0  | 57.0 $\pm$ 2.7 | 70.6 $\pm$ 5.5 | 70.6 $\pm$ 2.5 | n.d.            | n.d.            | n.d.            |
| <b>plasma (240 min containing 0.6 <math>\mu</math>M PLA)</b>              |      |                |                |                |                 |                 |                 |
| 1:320                                                                     | 1.9  | 66.2 $\pm$ 5.9 | 75.4 $\pm$ 3.5 | 77.7 $\pm$ 4.4 | n.d.            | n.d.            | n.d.            |
| 1:160                                                                     | 3.8  | 48.7 $\pm$ 1.3 | 57.1 $\pm$ 2.1 | 51.6 $\pm$ 1.1 | n.d.            | n.d.            | n.d.            |
| <b>plasma (300 min containing 0.35 <math>\mu</math>M PLA)</b>             |      |                |                |                |                 |                 |                 |
| 1:320                                                                     | 1.1  | 70.8 $\pm$ 8.6 | 79.8 $\pm$ 5.5 | 85.7 $\pm$ 1.3 | n.d.            | n.d.            | n.d.            |
| 1:160                                                                     | 2.2  | 55.7 $\pm$ 0.8 | 63.8 $\pm$ 2.7 | 67.1 $\pm$ 4.5 | n.d.            | n.d.            | n.d.            |
| <b>plasma (360 min containing 0.29 <math>\mu</math>M PLA)</b>             |      |                |                |                |                 |                 |                 |
| 1:320                                                                     | 0.9  | 77.8 $\pm$ 4.7 | 79.5 $\pm$ 6.7 | 85.7 $\pm$ 6.7 | n.d.            | n.d.            | n.d.            |
| 1:160                                                                     | 1.8  | 62.9 $\pm$ 3.9 | 65.2 $\pm$ 3.3 | 67.4 $\pm$ 1.1 | n.d.            | n.d.            | n.d.            |
| <b>plasma (420 min containing 0.31 <math>\mu</math>M PLA)</b>             |      |                |                |                |                 |                 |                 |
| 1:320                                                                     | 1.0  | 83.8 $\pm$ 3.2 | 89.2 $\pm$ 7.2 | 95.1 $\pm$ 3.7 | n.d.            | n.d.            | n.d.            |
| 1:160                                                                     | 1.9  | 60.1 $\pm$ 0.8 | 72.4 $\pm$ 3.0 | 69.6 $\pm$ 1.3 | n.d.            | n.d.            | n.d.            |
| <b>Sauerkraut experiment</b>                                              |      |                |                |                |                 |                 |                 |
| <b>plasma (before Sauerkraut containing 0.3 <math>\mu</math>M PLA)</b>    |      |                |                |                |                 |                 |                 |
| 1:160                                                                     | 2.1  | 64.7 $\pm$ 6.5 | 58.9 $\pm$ 2.5 | 64.1 $\pm$ 5.9 | 110.2 $\pm$ 0.7 | 111.3 $\pm$ 4.3 | 104.4 $\pm$ 4.1 |
| 1:320                                                                     | 1.1  | 86.2 $\pm$ 2.6 | 73.5 $\pm$ 1.1 | 87.7 $\pm$ 4.2 | 113.0 $\pm$ 3.7 | 104.7 $\pm$ 3.2 | 103.0 $\pm$ 3.6 |
| <b>plasma (2h postprandial containing 1.4 <math>\mu</math>M PLA)</b>      |      |                |                |                |                 |                 |                 |
| 1:160                                                                     | 8.8  | 67.8 $\pm$ 4.4 | 59.2 $\pm$ 3.6 | 86.6 $\pm$ 3.2 | 100.2 $\pm$ 2.8 | 107.1 $\pm$ 0.4 | 103.7 $\pm$ 4.9 |
| 1:320                                                                     | 4.4  | 90.8 $\pm$ 6.1 | 74.7 $\pm$ 3.8 | 98.5 $\pm$ 3.7 | 103.1 $\pm$ 5.9 | 103.5 $\pm$ 2.2 | 105.1 $\pm$ 5.2 |
| <b>urine (before Sauerkraut containing 1.8 <math>\mu</math>M PLA)</b>     |      |                |                |                |                 |                 |                 |
| 1:160                                                                     | 11.5 | 56.4 $\pm$ 3.3 | 61.4 $\pm$ 3.7 | 79.0 $\pm$ 5.5 | 91.7 $\pm$ 3.5  | 91.9 $\pm$ 2.9  | 98.0 $\pm$ 2.8  |
| 1:320                                                                     | 5.8  | 78.3 $\pm$ 1.7 | 69.3 $\pm$ 4.6 | 88.1 $\pm$ 5.0 | 95.4 $\pm$ 2.0  | 93.3 $\pm$ 1.5  | 93.0 $\pm$ 2.3  |
| <b>urine (230 min postprandial containing 14.3 <math>\mu</math>M PLA)</b> |      |                |                |                |                 |                 |                 |
| 1:160                                                                     | 89.2 | 71.1 $\pm$ 5.3 | 50.5 $\pm$ 2.9 | 74.5 $\pm$ 0.7 | 95.3 $\pm$ 4.6  | 93.4 $\pm$ 4.9  | 101.8 $\pm$ 3.9 |
| 1:320                                                                     | 44.6 | 89.0 $\pm$ 4.9 | 62.2 $\pm$ 3.3 | 83.5 $\pm$ 4.2 | 95.4 $\pm$ 0.3  | 92.0 $\pm$ 3.5  | 94.9 $\pm$ 1.2  |
| <b>urine (540 min postprandial containing 6.3 <math>\mu</math>M PLA)</b>  |      |                |                |                |                 |                 |                 |
| 1:160                                                                     | 39.2 | 77.8 $\pm$ 0.4 | 53.9 $\pm$ 1.7 | 80.8 $\pm$ 4.9 | 90.8 $\pm$ 2.2  | 95.0 $\pm$ 2.8  | 88.6 $\pm$ 2.6  |
| 1:320                                                                     | 19.6 | 89.5 $\pm$ 2.1 | 62.8 $\pm$ 5.9 | 82.1 $\pm$ 6.4 | 98.7 $\pm$ 0.7  | 92.6 $\pm$ 3.1  | 88.5 $\pm$ 3.4  |
| <b>urine (1080 min postprandial containing 3.1 <math>\mu</math>M PLA)</b> |      |                |                |                |                 |                 |                 |
| 1:160                                                                     | 19.2 | 73.8 $\pm$ 4.6 | 63.0 $\pm$ 3.2 | 85.0 $\pm$ 1.6 | 101.6 $\pm$ 4.7 | 108.4 $\pm$ 2.0 | 105.1 $\pm$ 2.3 |
| 1:320                                                                     | 9.6  | 83.4 $\pm$ 2.1 | 73.8 $\pm$ 2.0 | 88.7 $\pm$ 1.6 | 102.1 $\pm$ 1.5 | 101.6 $\pm$ 3.9 | 100.9 $\pm$ 3.7 |

| <b>urine (1230 min postprandial containing 1.8 <math>\mu</math>M PLA)</b> |      |                |                |                |                |                |                |
|---------------------------------------------------------------------------|------|----------------|----------------|----------------|----------------|----------------|----------------|
| 1:160                                                                     | 11.6 | 63.0 $\pm$ 4.5 | 63.6 $\pm$ 3.1 | 84.2 $\pm$ 0.6 | n.d.           | n.d.           | n.d.           |
| 1:320                                                                     | 5.8  | 79.4 $\pm$ 3.3 | 73.5 $\pm$ 2.3 | 87.3 $\pm$ 0.3 | n.d.           | n.d.           | n.d.           |
| <b>urine (180 min postprandial containing 5.0 <math>\mu</math>M PLA)</b>  |      |                |                |                |                |                |                |
| 1:160                                                                     | 31.4 | 81.1 $\pm$ 5.6 | 60.1 $\pm$ 2.4 | 90.4 $\pm$ 5.7 | n.d.           | n.d.           | n.d.           |
| 1:320                                                                     | 15.7 | 87.0 $\pm$ 4.6 | 69.4 $\pm$ 2.2 | 92.8 $\pm$ 5.3 | n.d.           | n.d.           | n.d.           |
| <b>urine (390 min postprandial containing 1.9 <math>\mu</math>M PLA)</b>  |      |                |                |                |                |                |                |
| 1:160                                                                     | 11.8 | 73.1 $\pm$ 4.9 | 59.2 $\pm$ 0.6 | 80.1 $\pm$ 6.0 | n.d.           | n.d.           | n.d.           |
| 1:320                                                                     | 5.9  | 78.1 $\pm$ 3.4 | 70.7 $\pm$ 1.6 | 86.3 $\pm$ 0.3 | n.d.           | n.d.           | n.d.           |
| <b>urine (540 min postprandial containing 1.4 <math>\mu</math>M PLA)</b>  |      |                |                |                |                |                |                |
| 1:160                                                                     | 8.6  | 69.6 $\pm$ 3.3 | 64.2 $\pm$ 2.0 | 79.0 $\pm$ 3.9 | n.d.           | n.d.           | n.d.           |
| 1:320                                                                     | 4.3  | 85.6 $\pm$ 1.6 | 71.1 $\pm$ 2.8 | 84.1 $\pm$ 4.4 | n.d.           | n.d.           | n.d.           |
| <b>urine (1425 min postprandial containing 3.1 <math>\mu</math>M PLA)</b> |      |                |                |                |                |                |                |
| 1:160                                                                     | 19.6 | 77.1 $\pm$ 5.0 | 70.6 $\pm$ 2.5 | 87.6 $\pm$ 4.1 | n.d.           | n.d.           | n.d.           |
| 1:320                                                                     | 9.8  | 82.5 $\pm$ 2.8 | 75.6 $\pm$ 1.9 | 93.7 $\pm$ 0.9 | n.d.           | n.d.           | n.d.           |
| <b>urine (360 min postprandial containing 10.3 <math>\mu</math>M PLA)</b> |      |                |                |                |                |                |                |
| 1:160                                                                     | 64.3 | 76.7 $\pm$ 2.0 | 53.0 $\pm$ 1.8 | 82.6 $\pm$ 3.4 | 88.6 $\pm$ 0.6 | 93.1 $\pm$ 2.4 | 93.7 $\pm$ 2.9 |
| 1:320                                                                     | 32.2 | 82.6 $\pm$ 5.2 | 64.1 $\pm$ 1.9 | 91.7 $\pm$ 4.0 | 91.1 $\pm$ 2.7 | 96.4 $\pm$ 1.2 | 98.4 $\pm$ 2.5 |
| <b>urine (after sauerkraut containing 1.5 <math>\mu</math>M PLA)</b>      |      |                |                |                |                |                |                |
| 1:160                                                                     | 9    | 68.7 $\pm$ 2.2 | 72.5 $\pm$ 4.5 | 90.8 $\pm$ 4.2 | n.d.           | n.d.           | n.d.           |
| 1:320                                                                     | 4.5  | 84.7 $\pm$ 1.1 | 77.8 $\pm$ 4.4 | 93.4 $\pm$ 5.9 | n.d.           | n.d.           | n.d.           |

CHO-K1 cells were transfected with receptor constructs and cAMP accumulation was determined with the ALPHAScreen™ technology (see Material and Methods). Data is given as mean  $\pm$  SEM of three independent experiments each performed in triplicates.
