# Supplementary material for: Metabolites of lactic acid bacteria present in fermented foods are highly potent agonists of human hydroxycarboxylic acid receptor 3
Source: PubMed Central journal article supplement (PMC6532841; doi:10.1371/journal.pgen.1008145), 2019-05-23
Supplement: pgen.1008145.s013.pdf [file pgen.1008145.s013.pdf]

**Supplementary Table S6**  
Comparison of manually curated RNA-Sequencing data versus reported FPKM for HCAR2 and HCAR3

| Experiment Accession | Experiment Title                                                    | Sample Accession | HCAR2 (FPKM) | HCAR3 (FPKM) | HCAR2 (P) | HCAR3 (P) | HCAR2 (NP) | HCAR3 (NP) | HCAR2 (T) | HCAR3 (T) | HCAR2 (P) HCAR3 (NP) | HCAR2 (NP) HCAR3 (P) | HCAR2 (P) HCAR3 (P) | HCAR2 (NP) HCAR3 (NP) |
|----------------------|---------------------------------------------------------------------|------------------|--------------|--------------|-----------|-----------|------------|------------|-----------|-----------|----------------------|----------------------|---------------------|-----------------------|
| SRX1874029           | GSM2212622: 10E smallbowel female control S1                        | SRS1523875       | 72.2         | 123.3        | 63        | 76        | 123        | 114        | 186       | 190       | 45                   | 57                   | 18                  | 66                    |
| SRX1874030           | GSM2212623: 10F rectum male Ulcerative Colitis S2                   | SRS1523876       | 48.6         | 82.3         | 35        | 40        | 63         | 59         | 98        | 99        | 21                   | 26                   | 14                  | 37                    |
| SRX1874031           | GSM2212624: 10G rightcolon female control S3                        | SRS1523877       | 94.5         | 39.1         | 54        | 32        | 34         | 58         | 88        | 90        | 42                   | 20                   | 12                  | 14                    |
| SRX1874032           | GSM2212625: 10H leftcolon male Ulcerative Colitis S4                | SRS1523878       | 55.5         | 13.1         | 36        | 9         | 17         | 45         | 53        | 54        | 33                   | 5                    | 3                   | 12                    |
| SRX1874033           | GSM2212626: 10J ileumcecum female Crohn's disease S5                | SRS1523879       | 13.0         | 26.9         | 26        | 38        | 30         | 18         | 56        | 56        | 13                   | 25                   | 13                  | 5                     |
| SRX1874034           | GSM2212627: 10K smallbowel female Crohn's disease S6                | SRS1523880       | 39.5         | 21.8         | 27        | 7         | 31         | 56         | 58        | 63        | 27                   | 7                    | 0                   | 24                    |
| SRX1874035           | GSM2212628: 10L leftcolon male Ulcerative Colitis S7                | SRS1523881       | 187.0        | 145.3        | 157       | 102       | 192        | 254        | 349       | 356       | 134                  | 79                   | 23                  | 113                   |
| SRX1874036           | GSM2212629: 10M rightcolon_noninflamed female Ulcerative Colitis S8 | SRS1523882       | 24.8         | 33.6         | 31        | 39        | 52         | 44         | 83        | 83        | 25                   | 33                   | 6                   | 19                    |
| SRX1874037           | GSM2212630: 10O smallbowel male Crohn's disease S9                  | SRS1523883       | 23.5         | 12.4         | 36        | 22        | 20         | 37         | 56        | 59        | 31                   | 14                   | 5                   | 6                     |
| SRX1874038           | GSM2212631: 10P rightcolon male control S10                         | SRS1523884       | 8.6          | 7.7          | 7         | 6         | 11         | 13         | 18        | 19        | 6                    | 5                    | 1                   | 6                     |
| SRX1874039           | GSM2212632: 10Q leftcolon male Crohn's disease S11                  | SRS1523885       | 11.4         | 28.4         | 19        | 37        | 42         | 25         | 61        | 62        | 13                   | 30                   | 6                   | 12                    |
| SRX1874040           | GSM2212633: 10R sigmoid male control S12                            | SRS1523886       | 8.9          | 5.5          | 14        | 8         | 13         | 19         | 27        | 27        | 11                   | 5                    | 3                   | 8                     |
| SRX1874041           | GSM2212634: 10S ileum male Crohn's disease S13                      | SRS1523887       | 143.0        | 189.3        | 191       | 197       | 280        | 283        | 471       | 480       | 142                  | 148                  | 49                  | 132                   |
| SRX1874042           | GSM2212635: 10U sigmoid male Crohn's disease S14                    | SRS1523888       | 68.9         | 96.5         | 117       | 121       | 135        | 138        | 252       | 259       | 82                   | 83                   | 35                  | 52                    |
| SRX1874043           | GSM2212636: 10V rightcolon female control S15                       | SRS1523889       | 27.5         | 48.4         | 26        | 31        | 45         | 40         | 71        | 71        | 17                   | 22                   | 9                   | 23                    |
| SRX1874044           | GSM2212637: 10W rightcolon female control S16                       | SRS1523890       | 12.0         | 5.1          | 7         | 3         | 20         | 24         | 27        | 27        | 6                    | 2                    | 1                   | 18                    |
| SRX1874045           | GSM2212638: 11B ileocolic male control S17                          | SRS1523891       | 17.2         | 24.9         | 23        | 27        | 32         | 28         | 55        | 55        | 18                   | 22                   | 5                   | 10                    |

|            |                                                          |            |        |        |     |      |      |      |      |      |     |     |     |     |
|------------|----------------------------------------------------------|------------|--------|--------|-----|------|------|------|------|------|-----|-----|-----|-----|
| SRX1874046 | GSM2212639: 11E smallbowel female control S18            | SRS1523892 | 58.0   | 71.1   | 100 | 108  | 122  | 117  | 222  | 225  | 71  | 78  | 29  | 44  |
| SRX1874047 | GSM2212640: 11I leftcolon female Ulcerative Colitis S19  | SRS1523893 | 44.1   | 58.4   | 39  | 33   | 77   | 86   | 116  | 119  | 30  | 24  | 9   | 53  |
| SRX1874048 | GSM2212641: 11L leftcolon male Ulcerative Colitis S20    | SRS1523894 | 1328.3 | 1924.4 | 927 | 1017 | 1725 | 1697 | 2652 | 2714 | 680 | 770 | 247 | 955 |
| SRX1874049 | GSM2212642: 11P rightcolon female Ulcerative Colitis S21 | SRS1523895 | 46.1   | 55.7   | 66  | 50   | 84   | 107  | 150  | 157  | 48  | 32  | 18  | 52  |
| SRX1874050 | GSM2212643: 11R rightcolon male control S22              | SRS1523896 | 22.7   | 14.1   | 23  | 10   | 14   | 29   | 37   | 39   | 18  | 5   | 5   | 9   |
| SRX1874051 | GSM2212644: 11S rightcolon female control S23            | SRS1523897 | 1.7    | 2.6    | 3   | 5    | 5    | 3    | 8    | 8    | 2   | 4   | 1   | 1   |
| SRX1874052 | GSM2212645: 11T rightcolon female Crohn's disease S24    | SRS1523898 | 94.4   | 106.2  | 141 | 117  | 148  | 183  | 289  | 300  | 92  | 64  | 49  | 84  |
| SRX1874053 | GSM2212646: 11U smallbowel female control S25            | SRS1523899 | 18.8   | 9.4    | 78  | 33   | 45   | 97   | 123  | 130  | 64  | 19  | 14  | 26  |
| SRX1874054 | GSM2212647: 11W rightcolon female control S26            | SRS1523900 | 16.2   | 4.2    | 26  | 8    | 15   | 34   | 41   | 42   | 22  | 4   | 4   | 11  |
| SRX1874055 | GSM2212648: 12F_6M leftcolon male control S27            | SRS1523901 | 10.1   | 12.3   | 19  | 20   | 23   | 22   | 42   | 42   | 13  | 14  | 6   | 9   |
| SRX1874056 | GSM2212649: 12H ileum female Crohn's disease S28         | SRS1523902 | 84.7   | 109.0  | 150 | 158  | 250  | 249  | 400  | 407  | 112 | 118 | 38  | 132 |
| SRX1874057 | GSM2212650: 12L rightcolon male Ulcerative Colitis S29   | SRS1523903 | 7.7    | 11.1   | 10  | 10   | 18   | 20   | 28   | 30   | 6   | 6   | 4   | 12  |
| SRX1874058 | GSM2212651: 12M leftcolon male Ulcerative Colitis S30    | SRS1523904 | 127.7  | 91.7   | 175 | 121  | 156  | 211  | 331  | 332  | 130 | 76  | 45  | 80  |
| SRX1874059 | GSM2212652: 12O smallbowel female Crohn's disease S31    | SRS1523905 | 58.9   | 70.7   | 22  | 17   | 28   | 33   | 50   | 50   | 21  | 16  | 1   | 12  |
| SRX1874060 | GSM2212653: 12P rightcolon male Ulcerative Colitis S32   | SRS1523906 | 4.5    | 4.5    | 6   | 4    | 7    | 9    | 13   | 13   | 4   | 2   | 2   | 5   |
| SRX1874061 | GSM2212654: 12R rightcolon female control S33            | SRS1523908 | 4.8    | 4.8    | 3   | 3    | 12   | 12   | 15   | 15   | 3   | 3   | 0   | 9   |
| SRX1874062 | GSM2212655: 12S rightcolon male control S34              | SRS1523907 | 12.9   | 27.0   | 12  | 24   | 32   | 20   | 44   | 44   | 8   | 20  | 4   | 12  |
| SRX1874063 | GSM2212656: 12T sigmoid female Ulcerative Colitis S35    | SRS1523909 | 147.5  | 172.0  | 560 | 448  | 829  | 970  | 1389 | 1418 | 421 | 309 | 139 | 519 |
| SRX1874064 | GSM2212657: 12U leftcolon female control S36             | SRS1523910 | 28.0   | 14.5   | 29  | 14   | 23   | 40   | 52   | 54   | 23  | 8   | 6   | 15  |
| SRX1874065 | GSM2212658: 12W smallbowel male control S37              | SRS1523911 | 34.1   | 75.3   | 44  | 74   | 111  | 85   | 155  | 159  | 31  | 60  | 13  | 51  |
| SRX1874066 | GSM2212659: 1C sigmoid female control S38                | SRS1523912 | 8.4    | 19.3   | 16  | 20   | 20   | 16   | 36   | 36   | 5   | 9   | 11  | 11  |
| SRX1874067 | GSM2212660: 1D_7D sigmoid female control S39             | SRS1523913 | 98.1   | 50.9   | 99  | 51   | 94   | 142  | 193  | 193  | 86  | 38  | 13  | 56  |
| SRX1874068 | GSM2212661: 1F ileum female control S40                  | SRS1523915 | 6.6    | 3.9    | 6   | 3    | 7    | 10   | 13   | 13   | 4   | 1   | 2   | 6   |

|            |                                                               |            |       |       |     |     |     |     |     |     |     |     |    |     |
|------------|---------------------------------------------------------------|------------|-------|-------|-----|-----|-----|-----|-----|-----|-----|-----|----|-----|
| SRX1874069 | GSM2212662: 1I sigmoid male control S41                       | SRS1523914 | 2.6   | 2.1   | 5   | 4   | 7   | 8   | 12  | 12  | 3   | 2   | 2  | 5   |
| SRX1874070 | GSM2212663: 1M rectum male Ulcerative Colitis S42             | SRS1523916 | 118.0 | 111.3 | 130 | 111 | 153 | 179 | 283 | 290 | 105 | 84  | 25 | 69  |
| SRX1874071 | GSM2212664: 1O smallbowel female Crohn's disease S43          | SRS1523917 | 82.7  | 114.6 | 101 | 99  | 141 | 147 | 242 | 246 | 82  | 80  | 19 | 61  |
| SRX1874072 | GSM2212665: 1P leftcolon male Ulcerative Colitis S44          | SRS1523918 | 117.0 | 143.1 | 140 | 146 | 218 | 219 | 358 | 365 | 114 | 119 | 26 | 99  |
| SRX1874073 | GSM2212666: 1R colon male control S45                         | SRS1523919 | 11.4  | 3.4   | 9   | 2   | 6   | 13  | 15  | 15  | 9   | 2   | 0  | 4   |
| SRX1874074 | GSM2212667: 1T colon female control S46                       | SRS1523920 | 2.3   | 1.2   | 4   | 1   | 3   | 7   | 7   | 8   | 4   | 0   | 0  | 3   |
| SRX1874075 | GSM2212668: 1Y colon male control S47                         | SRS1523921 | 6.5   | 5.4   | 7   | 6   | 4   | 6   | 11  | 12  | 5   | 3   | 2  | 1   |
| SRX1874076 | GSM2212669: 2D rightcolon male control S48                    | SRS1523922 | 25.6  | 26.9  | 21  | 20  | 40  | 42  | 61  | 62  | 11  | 10  | 10 | 30  |
| SRX1874077 | GSM2212670: 2E smallbowel male control S49                    | SRS1523923 | 21.5  | 32.9  | 22  | 25  | 39  | 40  | 61  | 65  | 12  | 15  | 10 | 24  |
| SRX1874078 | GSM2212671: 2F sigmoid male control S50                       | SRS1523924 | 5.2   | 0.0   | 4   | 0   | 1   | 5   | 5   | 5   | 4   | 0   | 0  | 1   |
| SRX1874079 | GSM2212672: 2I sigmoid male control S51                       | SRS1523925 | 1.8   | 3.6   | 4   | 2   | 6   | 8   | 10  | 10  | 2   | 0   | 2  | 6   |
| SRX1874080 | GSM2212673: 2J ileum male Crohn's disease S52                 | SRS1523926 | 46.1  | 58.2  | 104 | 101 | 131 | 140 | 235 | 241 | 75  | 70  | 29 | 61  |
| SRX1874081 | GSM2212674: 2K ileum male Crohn's disease S53                 | SRS1523927 | 89.0  | 61.5  | 108 | 76  | 57  | 94  | 165 | 170 | 75  | 38  | 33 | 19  |
| SRX1874082 | GSM2212675: 2L smallbowel male Crohn's disease S54            | SRS1523928 | 59.5  | 121.5 | 60  | 95  | 215 | 184 | 275 | 279 | 38  | 71  | 22 | 144 |
| SRX1874083 | GSM2212676: 2M rectosigmoid female control S55                | SRS1523929 | 11.2  | 14.2  | 10  | 9   | 20  | 23  | 30  | 32  | 7   | 6   | 3  | 14  |
| SRX1874084 | GSM2212677: 2N leftcolon female control S56                   | SRS1523930 | 2.4   | 2.4   | 1   | 1   | 1   | 1   | 2   | 2   | 1   | 1   | 0  | 0   |
| SRX1874085 | GSM2212678: 2P ileum male Crohn's disease S57                 | SRS1523931 | 10.3  | 7.3   | 15  | 13  | 18  | 20  | 33  | 33  | 10  | 8   | 5  | 10  |
| SRX1874086 | GSM2212679: 2Q rightcolon_inflamed female Crohn's disease S58 | SRS1523932 | 16.4  | 24.5  | 22  | 20  | 37  | 39  | 59  | 59  | 17  | 15  | 5  | 22  |
| SRX1874087 | GSM2212680: 2R rightcolon female control S59                  | SRS1523933 | 4.3   | 3.4   | 5   | 3   | 7   | 9   | 12  | 12  | 5   | 3   | 0  | 4   |
| SRX1874088 | GSM2212681: 2S leftcolon female Crohn's disease S60           | SRS1523934 | 65.7  | 117.7 | 102 | 115 | 209 | 208 | 311 | 323 | 75  | 88  | 27 | 121 |
| SRX1874089 | GSM2212682: 2T rightcolon female control S61                  | SRS1523935 | 0.8   | 0.8   | 2   | 1   | 2   | 3   | 4   | 4   | 1   | 0   | 1  | 2   |
| SRX1874090 | GSM2212683: 2Y sigmoid male control S62                       | SRS1523936 | 5.3   | 3.3   | 9   | 3   | 6   | 12  | 15  | 15  | 8   | 2   | 1  | 4   |
| SRX1874091 | GSM2212684: 3B sigmoid male control S63                       | SRS1523937 | 3.6   | 2.2   | 7   | 4   | 4   | 7   | 11  | 11  | 5   | 2   | 2  | 2   |
| SRX1874092 | GSM2212685: 3G transversecolon female control S64             | SRS1523938 | 42.3  | 78.0  | 56  | 61  | 107 | 109 | 163 | 170 | 43  | 46  | 13 | 61  |

|            |                                                        |            |        |        |     |     |     |     |      |      |     |     |     |     |
|------------|--------------------------------------------------------|------------|--------|--------|-----|-----|-----|-----|------|------|-----|-----|-----|-----|
| SRX1874093 | GSM2212686: 3I leftcolon female Ulcerative Colitis S65 | SRS1523939 | 37.9   | 53.6   | 32  | 37  | 35  | 32  | 67   | 69   | 21  | 26  | 11  | 9   |
| SRX1874094 | GSM2212687: 3K leftcolon female Ulcerative Colitis S66 | SRS1523940 | 1090.9 | 1379.9 | 378 | 451 | 771 | 723 | 1149 | 1174 | 274 | 335 | 104 | 436 |
| SRX1874095 | GSM2212688: 3M smallbowel male control S67             | SRS1523941 | 296.0  | 396.8  | 326 | 420 | 420 | 336 | 746  | 756  | 243 | 329 | 83  | 91  |
| SRX1874096 | GSM2212689: 3N colon male Crohn's disease S68          | SRS1523942 | 66.7   | 53.5   | 69  | 59  | 62  | 74  | 131  | 133  | 54  | 42  | 15  | 20  |
| SRX1874097 | GSM2212690: 3R sigmoid male control S69                | SRS1523943 | 3.7    | 6.7    | 8   | 10  | 9   | 7   | 17   | 17   | 5   | 7   | 3   | 2   |
| SRX1874098 | GSM2212691: 3S ileum male Crohn's disease S70          | SRS1523944 | 28.3   | 34.4   | 40  | 47  | 41  | 36  | 81   | 83   | 31  | 36  | 9   | 5   |
| SRX1874099 | GSM2212692: 3W rectum male control S71                 | SRS1523945 | 17.0   | 21.9   | 13  | 14  | 33  | 34  | 46   | 48   | 13  | 14  | 0   | 19  |
| SRX1874100 | GSM2212693: 4D rightcolon female control S72           | SRS1523946 | 17.0   | 25.8   | 22  | 29  | 43  | 38  | 65   | 67   | 16  | 23  | 6   | 20  |
| SRX1874101 | GSM2212694: 4E 9H ileum female Crohn's disease S73     | SRS1523948 | 7.2    | 9.4    | 10  | 15  | 16  | 11  | 26   | 26   | 7   | 12  | 3   | 4   |
| SRX1874102 | GSM2212695: 4F rectum female control S74               | SRS1523947 | 12.0   | 43.9   | 2   | 8   | 17  | 11  | 19   | 19   | 0   | 6   | 2   | 11  |
| SRX1874103 | GSM2212696: 4J smallbowel female Crohn's disease S75   | SRS1523949 | 109.3  | 279.1  | 140 | 286 | 310 | 172 | 450  | 458  | 89  | 230 | 51  | 80  |
| SRX1874104 | GSM2212697: 4K leftcolon female Ulcerative Colitis S76 | SRS1523950 | 130.7  | 157.7  | 241 | 184 | 325 | 391 | 566  | 575  | 189 | 130 | 52  | 195 |
| SRX1874105 | GSM2212698: 4L ileum female Crohn's disease S77        | SRS1523951 | 13.2   | 16.8   | 18  | 13  | 36  | 41  | 54   | 54   | 14  | 9   | 4   | 27  |
| SRX1874106 | GSM2212699: 4M ileum male control S78                  | SRS1523952 | 25.2   | 10.9   | 33  | 11  | 18  | 40  | 51   | 51   | 24  | 2   | 9   | 16  |
| SRX1874107 | GSM2212700: 4P leftcolon male Ulcerative Colitis S79   | SRS1523954 | 2.1    | 3.2    | 2   | 3   | 3   | 2   | 5    | 5    | 2   | 3   | 0   | 0   |
| SRX1874108 | GSM2212701: 4S smallbowel male Crohn's disease S80     | SRS1523953 | 10.2   | 6.8    | 10  | 7   | 7   | 10  | 17   | 17   | 8   | 5   | 2   | 2   |
| SRX1874109 | GSM2212702: 4W leftcolon male Crohn's disease S81      | SRS1523955 | 246.2  | 249.6  | 234 | 200 | 307 | 349 | 541  | 549  | 181 | 146 | 53  | 161 |
| SRX1874110 | GSM2212703: 4Y ileum female Crohn's disease S82        | SRS1523957 | 555.8  | 812.1  | 509 | 522 | 686 | 704 | 1195 | 1226 | 359 | 359 | 150 | 327 |
| SRX1874111 | GSM2212704: 5D ileum male Crohn's disease S83          | SRS1523956 | 24.4   | 26.2   | 29  | 34  | 40  | 35  | 69   | 69   | 19  | 24  | 10  | 16  |
| SRX1874112 | GSM2212705: 5J leftcolon male Ulcerative Colitis S84   | SRS1523958 | 78.8   | 39.9   | 76  | 30  | 78  | 124 | 154  | 154  | 64  | 18  | 12  | 60  |
| SRX1874113 | GSM2212706: 5M leftcolon male Ulcerative Colitis S85   | SRS1523959 | 167.1  | 163.5  | 230 | 212 | 198 | 222 | 428  | 434  | 168 | 145 | 62  | 53  |
| SRX1874114 | GSM2212707: 5N ileum female Crohn's disease S86        | SRS1523960 | 7.3    | 16.0   | 13  | 22  | 30  | 21  | 43   | 43   | 5   | 14  | 8   | 16  |
| SRX1874115 | GSM2212708: 5P smallbowel male Ulcerative Colitis S87  | SRS1523961 | 22.9   | 41.2   | 35  | 40  | 54  | 51  | 89   | 91   | 24  | 28  | 11  | 26  |

|            |                                                                   |            |       |       |     |     |     |     |      |      |     |     |     |     |
|------------|-------------------------------------------------------------------|------------|-------|-------|-----|-----|-----|-----|------|------|-----|-----|-----|-----|
| SRX1874116 | GSM2212709: 5S smallbowel male Crohn's disease S88                | SRS1523962 | 104.9 | 111.4 | 160 | 144 | 214 | 234 | 374  | 378  | 113 | 97  | 47  | 117 |
| SRX1874117 | GSM2212710: 6E rectosigmoid female control S89                    | SRS1523963 | 8.6   | 7.8   | 13  | 11  | 14  | 16  | 27   | 27   | 7   | 5   | 6   | 9   |
| SRX1874118 | GSM2212711: 6H smallbowel male Crohn's disease S90                | SRS1523964 | 16.3  | 33.3  | 36  | 56  | 62  | 44  | 98   | 100  | 22  | 41  | 14  | 21  |
| SRX1874119 | GSM2212712: 6J leftcolon male Ulcerative Colitis S91              | SRS1523965 | 272.4 | 394.4 | 409 | 487 | 501 | 430 | 910  | 917  | 286 | 358 | 123 | 143 |
| SRX1874120 | GSM2212713: 6N rectum male Ulcerative Colitis S92                 | SRS1523966 | 460.9 | 491.7 | 318 | 281 | 366 | 411 | 684  | 692  | 248 | 205 | 70  | 161 |
| SRX1874121 | GSM2212714: 6O rightcolon_noninflamed male Ulcerative Colitis S93 | SRS1523967 | 13.7  | 16.1  | 27  | 24  | 38  | 43  | 65   | 67   | 18  | 15  | 9   | 23  |
| SRX1874122 | GSM2212715: 6P leftcolon female Ulcerative Colitis S94            | SRS1523968 | 25.9  | 49.7  | 31  | 52  | 46  | 27  | 77   | 79   | 20  | 39  | 11  | 7   |
| SRX1874123 | GSM2212716: 6R colon male control S95                             | SRS1523969 | 6.0   | 4.5   | 4   | 2   | 3   | 5   | 7    | 7    | 4   | 2   | 0   | 1   |
| SRX1874124 | GSM2212717: 6S leftcolon male Crohn's disease S96                 | SRS1523970 | 73.1  | 34.6  | 28  | 15  | 10  | 24  | 38   | 39   | 18  | 5   | 10  | 5   |
| SRX1874125 | GSM2212718: 6T sigmoid female control S97                         | SRS1523971 | 7.1   | 27.8  | 16  | 35  | 43  | 25  | 59   | 60   | 10  | 28  | 6   | 15  |
| SRX1874126 | GSM2212719: 6U ileum male Crohn's disease S98                     | SRS1523972 | 229.7 | 270.3 | 363 | 323 | 411 | 458 | 774  | 781  | 245 | 205 | 118 | 206 |
| SRX1874127 | GSM2212720: 6W leftcolon female Crohn's disease S99               | SRS1523973 | 223.3 | 297.4 | 458 | 518 | 725 | 688 | 1183 | 1206 | 339 | 389 | 119 | 336 |
| SRX1874128 | GSM2212721: 7C rectosigmoid female control S100                   | SRS1523974 | 19.3  | 12.9  | 46  | 27  | 37  | 56  | 83   | 83   | 34  | 15  | 12  | 22  |
| SRX1874129 | GSM2212722: 7E ileum female Crohn's disease S101                  | SRS1523975 | 20.4  | 13.9  | 34  | 14  | 47  | 67  | 81   | 81   | 30  | 10  | 4   | 37  |
| SRX1874130 | GSM2212723: 7H leftcolon male Ulcerative Colitis S102             | SRS1523976 | 66.3  | 80.9  | 111 | 128 | 180 | 165 | 291  | 293  | 86  | 103 | 25  | 77  |
| SRX1874131 | GSM2212724: 7L leftcolon male Crohn's disease S103                | SRS1523977 | 6.2   | 8.9   | 9   | 10  | 14  | 14  | 23   | 24   | 6   | 7   | 3   | 7   |
| SRX1874132 | GSM2212725: 7M leftcolon male Ulcerative Colitis S104             | SRS1523978 | 84.0  | 67.0  | 83  | 45  | 90  | 131 | 173  | 176  | 70  | 32  | 13  | 58  |
| SRX1874133 | GSM2212726: 7R rightcolon female control S105                     | SRS1523980 | 49.5  | 42.7  | 81  | 75  | 54  | 61  | 135  | 136  | 52  | 46  | 29  | 8   |
| SRX1874134 | GSM2212727: 7S leftcolon female control S106                      | SRS1523979 | 21.0  | 20.2  | 31  | 29  | 34  | 36  | 65   | 65   | 24  | 22  | 7   | 12  |
| SRX1874135 | GSM2212728: 7T leftcolon female Ulcerative Colitis S107           | SRS1523981 | 17.5  | 5.1   | 23  | 4   | 11  | 32  | 34   | 36   | 22  | 3   | 1   | 8   |
| SRX1874136 | GSM2212729: 7 transversecolon male control S108                   | SRS1523982 | 13.5  | 10.2  | 15  | 6   | 16  | 25  | 31   | 31   | 14  | 5   | 1   | 11  |
| SRX1874137 | GSM2212730: 7U rectosigmoid female control S109                   | SRS1523983 | 110.9 | 63.6  | 186 | 89  | 152 | 258 | 338  | 347  | 146 | 49  | 40  | 103 |
| SRX1874138 | GSM2212731: 7V rectosigmoid female control S110                   | SRS1523984 | 42.5  | 32.4  | 51  | 41  | 68  | 78  | 119  | 119  | 41  | 31  | 10  | 37  |

|            |                                                                      |            |       |       |     |     |     |     |      |      |     |     |     |     |
|------------|----------------------------------------------------------------------|------------|-------|-------|-----|-----|-----|-----|------|------|-----|-----|-----|-----|
| SRX1874139 | GSM2212732: 7W ileum male Crohn's disease S111                       | SRS1523985 | 117.2 | 56.9  | 138 | 48  | 100 | 193 | 238  | 241  | 122 | 32  | 16  | 68  |
| SRX1874140 | GSM2212733: 8C rightcolon female control S112                        | SRS1523986 | 29.5  | 59.1  | 7   | 17  | 14  | 4   | 21   | 21   | 1   | 11  | 6   | 3   |
| SRX1874141 | GSM2212734: 8E smallbowel male Crohn's disease S113                  | SRS1523987 | 74.6  | 90.0  | 29  | 27  | 53  | 57  | 82   | 84   | 23  | 21  | 6   | 32  |
| SRX1874142 | GSM2212735: 8F ileum male Crohn's disease S114                       | SRS1523988 | 32.8  | 55.8  | 62  | 86  | 114 | 97  | 176  | 183  | 41  | 65  | 21  | 49  |
| SRX1874143 | GSM2212736: 8I leftcolon female Ulcerative Colitis S115              | SRS1523989 | 169.3 | 249.4 | 245 | 332 | 410 | 333 | 655  | 665  | 183 | 265 | 62  | 145 |
| SRX1874144 | GSM2212737: 8J ileum male Crohn's disease S116                       | SRS1523990 | 314.7 | 324.5 | 392 | 386 | 781 | 815 | 1173 | 1201 | 287 | 281 | 105 | 500 |
| SRX1874145 | GSM2212738: 8K ileum female Crohn's disease S117                     | SRS1523991 | 57.3  | 77.6  | 37  | 41  | 88  | 89  | 125  | 130  | 25  | 29  | 12  | 59  |
| SRX1874146 | GSM2212739: 8L smallbowel female control S118                        | SRS1523992 | 24.3  | 20.2  | 21  | 14  | 30  | 37  | 51   | 51   | 11  | 4   | 10  | 26  |
| SRX1874147 | GSM2212740: 8M leftcolon male Ulcerative Colitis S119                | SRS1523993 | 170.1 | 183.5 | 166 | 152 | 191 | 207 | 357  | 359  | 121 | 107 | 45  | 84  |
| SRX1874148 | GSM2212741: 8Q rightcolon female control S120                        | SRS1523994 | 2.4   | 0.0   | 5   | 3   | 2   | 4   | 7    | 7    | 2   | 0   | 3   | 2   |
| SRX1874149 | GSM2212742: 8S smallbowel male Crohn's disease S121                  | SRS1523995 | 64.0  | 113.5 | 79  | 100 | 140 | 125 | 219  | 225  | 57  | 75  | 22  | 65  |
| SRX1874150 | GSM2212743: 8 ileum male Crohn's disease S122                        | SRS1523996 | 332.1 | 401.7 | 94  | 120 | 195 | 173 | 289  | 293  | 70  | 95  | 24  | 100 |
| SRX1874151 | GSM2212744: 8U leftcolon female Ulcerative Colitis S123              | SRS1523997 | 325.5 | 267.2 | 462 | 246 | 539 | 775 | 1001 | 1021 | 394 | 178 | 68  | 361 |
| SRX1874152 | GSM2212745: 8V leftcolon male control S124                           | SRS1523998 | 17.3  | 20.4  | 24  | 20  | 34  | 38  | 58   | 58   | 19  | 15  | 5   | 19  |
| SRX1874153 | GSM2212746: 8W transversecolon female control S125                   | SRS1523999 | 36.2  | 13.4  | 85  | 34  | 79  | 131 | 164  | 165  | 71  | 20  | 14  | 59  |
| SRX1874154 | GSM2212747: 9F transversecolon female control S126                   | SRS1524000 | 109.3 | 56.6  | 79  | 50  | 68  | 98  | 147  | 148  | 62  | 32  | 17  | 36  |
| SRX1874155 | GSM2212748: 9I_6I leftcolon male Ulcerative Colitis S127             | SRS1524001 | 67.5  | 53.6  | 72  | 64  | 65  | 74  | 137  | 138  | 49  | 41  | 23  | 24  |
| SRX1874156 | GSM2212749: 9L sigmoid male control S128                             | SRS1524003 | 10.8  | 20.5  | 7   | 10  | 25  | 24  | 32   | 34   | 7   | 10  | 0   | 15  |
| SRX1874157 | GSM2212750: 9N ileum_slightlyinflamed female Ulcerative Colitis S129 | SRS1524002 | 64.0  | 31.2  | 69  | 39  | 90  | 121 | 159  | 160  | 56  | 26  | 13  | 64  |
| SRX1874158 | GSM2212751: 9O leftcolon male Crohn's disease S130                   | SRS1524004 | 244.6 | 362.6 | 210 | 265 | 367 | 318 | 577  | 583  | 158 | 212 | 52  | 155 |
| SRX1874159 | GSM2212752: 9Q sigmoid male Crohn's disease S131                     | SRS1524005 | 1.9   | 6.6   | 4   | 10  | 7   | 2   | 11   | 12   | 1   | 7   | 3   | 0   |
| SRX1874160 | GSM2212753: 9R rightcolon female control S132                        | SRS1524006 | 26.4  | 23.4  | 32  | 27  | 32  | 39  | 64   | 66   | 23  | 17  | 9   | 15  |
| SRX1874161 | GSM2212754: 9S smallbowel male control S133                          | SRS1524007 | 79.5  | 89.7  | 111 | 96  | 170 | 193 | 281  | 289  | 82  | 67  | 29  | 103 |

|            |                                          |            |      |      |       |       |       |       |       |       |      |      |      |      |
|------------|------------------------------------------|------------|------|------|-------|-------|-------|-------|-------|-------|------|------|------|------|
| SRX1874162 | GSM2212755: 9V colon female control S134 | SRS1524008 | 29.6 | 24.5 | 47    | 33    | 38    | 52    | 85    | 85    | 35   | 21   | 12   | 17   |
|            |                                          |            |      |      |       |       |       |       |       |       |      |      |      |      |
|            | total (all samples)                      |            |      |      | 11851 | 11351 | 16724 | 17761 | 28575 | 29112 | 8836 | 8214 | 3015 | 8509 |

Using HCAR2 (NCBI Reference Sequence: NM\_177551.3) and HCAR3 (NCBI Reference Sequence: NM\_006018.2) as query sequences we performed an Sequence Read Archive Nucleotide BLAST (<https://blast.ncbi.nlm.nih.gov/Blast.cgi>) for all RNA-Sequencing samples (accession numbers SRX1874029 – SRX1874162, 134 samples total) belonging to Bioproject: PRJNA326727, (GEO Accession: GSE83687) selecting Megablast due to its fast and optimized algorithm for highly similar sequences.

Match-mismatch scores and gap opening-gap extending penalties are tuned to avoid low similarity alignments and high number of mismatches, insertions/deletions (match = 4, mismatch = -5, gap open = 6, gap extend = 5). After the alignment by Megablast the number of aligned reads to HCAR2 and HCAR3 are counted. In the case of multiple mappings of the same read to several positions, the alignment with highest %identity and longest alignment length is taken into account. Then collected number of reads from alignment results were classified according to their edit distance to HCAR2 and HCAR3 genes, i.e. reads that are mapped to HCAR3 perfectly but mapped to HCAR2 with mismatches/insertions/deletions and vice versa. (total numbers for all samples are given in the table). We are aware that by using Megablast querying the SRA database the common first steps of RNA-Seq analysis (like removing adapter sequences/over-represented sequences/low quality sequences/experimental artifacts from reads) are not employed which affects the mapping quality and explains the observed number of reads in our results compared to the calculated FPKM values from the study (Bioproject: PRJNA326727, GEO Accession: GSE83687) which were retrieved from the NCBI database [48]. HCAR2 (P): number of reads that are matched perfectly to HCAR2; HCAR3 (P): number of reads that are matched perfectly to HCAR3; HCAR2 (NP): number of reads that are non-perfectly matched to HCAR2; HCAR3 (NP): number of reads that are non-perfectly matched to HCAR3; HCAR2 (P) HCAR3 (NP): number of reads that are matched perfectly to HCAR2 but non-perfectly matched to HCAR3; HCAR2 (NP) HCAR3 (P): number of reads that are matched perfectly to HCAR3 but non-perfectly matched to HCAR2; HCAR2 (P) HCAR3 (P): number of reads that are perfectly matched to both genes; HCAR2 (NP) HCAR3 (NP) number of reads that are non-perfectly matched (containing mismatches/gaps) to both genes
