# Supplementary material for: Metabolites of lactic acid bacteria present in fermented foods are highly potent agonists of human hydroxycarboxylic acid receptor 3
Source: PubMed Central journal article supplement (PMC6532841; doi:10.1371/journal.pgen.1008145), 2019-05-23
Supplement: pgen.1008145.s014.pdf [file pgen.1008145.s014.pdf]

### Supplementary Table S7

TPM values as downloaded from <https://www.ebi.ac.uk/gxa/home> [8]

| organism part/tissue/cell type                                       | Expression Atlas | HCAR1 | HCAR2 | HCAR3 |
|----------------------------------------------------------------------|------------------|-------|-------|-------|
| blood                                                                | E-MTAB-5214      | 0.1   | 97    | 42    |
| neutrophil, mature                                                   | E-MTAB-3827      | 0.9   | 85    | 103   |
| monocyte, CD14-positive, CD16-negative classical                     | E-MTAB-3827      | 0.4   | 72    | 82    |
| neutrophil, segmented of bone marrow                                 | E-MTAB-3827      | 0.6   | 53    | 58    |
| dendritic cell, conventional                                         | E-MTAB-3827      | 0.3   | 5     | 6     |
| macrophage, alternatively activated                                  | E-MTAB-3827      | 1     | 2     | 6     |
| macrophage, inflammatory                                             | E-MTAB-3827      | 0.1   | 3     | 5     |
| macrophage                                                           | E-MTAB-3827      | 0.3   | 1     | 3     |
| thymocyte, CD4-positive, alpha-beta                                  | E-MTAB-3827      | 9     | 2     | 2     |
| eosinophil, mature                                                   | E-MTAB-3827      | 0.2   | 1     | 2     |
| granulocyte monocyte progenitor cell                                 | E-MTAB-3819      | 0.8   | 0.1   | 2     |
| hematopoietic stem cell                                              | E-MTAB-3819      | 1     | 3     | 1     |
| megakaryocyte cell, CD34-, CD41+, CD42+                              | E-MTAB-3819      | 0.7   | 1     | 1     |
| T cell, CD8-positive, alpha-beta                                     | E-MTAB-3827      | 0.2   | 0.7   | 0.7   |
| metamyelocyte, neutrophilic                                          | E-MTAB-3827      | 0.3   | 0.7   | 0.5   |
| erythroblast                                                         | E-MTAB-3827      | 0.2   | 0.4   | 0.2   |
| thymocyte, CD3-positive, CD4-positive, CD8-positive, double positive | E-MTAB-3827      | 1     | 0.1   | 0.1   |
| B cell, CD38-negative naive                                          | E-MTAB-3827      | 0.4   | -     | 0.1   |
| erythroblast                                                         | E-MTAB-3819      | 0.2   | -     | 0.1   |
| leukocyte                                                            | E-MTAB-513       | 0.5   | 36    | 11    |
| lymphocyte, EBV-transformed                                          | E-MTAB-5214      | 0.3   | 0.8   | 2     |
| vermiform appendix                                                   | E-MTAB-2836      | 0.2   | 43    | 24    |
| bone marrow                                                          | E-MTAB-2836      | -     | 36    | 20    |
| spleen                                                               | E-MTAB-2836      | 6     | 58    | 23    |
| spleen                                                               | E-MTAB-4344      | 5     | 12    | 15    |
| spleen                                                               | E-MTAB-5214      | 5     | 22    | 7     |
| tonsil                                                               | E-MTAB-2836      | 0.2   | 25    | 14    |
| lymph node                                                           | E-MTAB-513       | 1     | 6     | 2     |
| lymph node                                                           | E-MTAB-2836      | 0.3   | 1     | 0.9   |
| thymus                                                               | E-MTAB-3871      | 0.4   | 1     | 0.2   |
| skin                                                                 | E-MTAB-2836      | 0.5   | 48    | 21    |
| skin                                                                 | E-MTAB-5214      | 0.4   | 34    | 5     |
| skin                                                                 | E-MTAB-5214      | 0.4   | 31    | 4     |
| urinary bladder                                                      | E-MTAB-2836      | 5     | 15    | 13    |
| urinary bladder                                                      | E-MTAB-5214      | 1     | 3     | 0.6   |
| lung                                                                 | E-MTAB-4344      | 1     | 19    | 9     |
| lung                                                                 | E-MTAB-513       | 1     | 32    | 7     |
| lung                                                                 | E-MTAB-2836      | 1     | 35    | 6     |
| lung                                                                 | E-MTAB-5214      | 0.5   | 9     | 2     |
| adipose tissue                                                       | E-MTAB-4344      | 7     | 17    | 5     |
| adipose tissue                                                       | E-MTAB-2836      | 17    | 39    | 3     |

|                              |             |     |     |     |
|------------------------------|-------------|-----|-----|-----|
| adipose tissue, subcutaneous | E-MTAB-5214 | 3   | 11  | 0.9 |
| adipose tissue               | E-MTAB-513  | 6   | 9   | 0.8 |
| breast                       | E-MTAB-513  | 26  | 39  | 3   |
| breast                       | E-MTAB-5214 | 11  | 8   | 1   |
| vagina                       | E-MTAB-5214 | 0.8 | 21  | 1   |
| ectocervix                   | E-MTAB-5214 | 2   | 0.7 | 0.1 |
| endocervix                   | E-MTAB-5214 | 3   | 0.3 | 0.1 |
| endometrium                  | E-MTAB-2836 | 1   | 0.8 | -   |
| ovary                        | E-MTAB-5214 | 0.6 | 0.2 | -   |
| ovary                        | E-MTAB-4344 | 2   | 0.3 | 0.3 |
| ovary                        | E-MTAB-513  | 4   | 0.1 | 0.1 |
| ovary                        | E-MTAB-2836 | 1   | -   | -   |
| fallopian tube               | E-MTAB-5214 | 2   | 0.5 | 0.2 |
| fallopian tube               | E-MTAB-2836 | 8   | 2   | 0.8 |
| placenta                     | E-MTAB-3871 | 0.6 | 0.3 | 0.1 |
| placenta                     | E-MTAB-2836 | 3   | 10  | 2   |
| prostate gland               | E-MTAB-5214 | 1   | 3   | 0.3 |
| prostate gland               | E-MTAB-513  | 7   | 9   | 3   |
| prostate gland               | E-MTAB-2836 | 5   | 3   | 0.7 |
| testis                       | E-MTAB-5214 | 2   | 4   | 0.1 |
| testis                       | E-MTAB-4344 | 2   | 4   | 0.3 |
| testis                       | E-MTAB-3716 | 2   | 4   | 0.4 |
| testis                       | E-MTAB-513  | 3   | 2   | 0.1 |
| testis                       | E-MTAB-2836 | 2   | 5   | 0.3 |
| salivary gland               | E-MTAB-5214 | 3   | 13  | 0.5 |
| salivary gland               | E-MTAB-2836 | 7   | 3   | 0.6 |
| esophagus                    | E-MTAB-2836 | 0.2 | 61  | 18  |
| esophagus mucosa             | E-MTAB-5214 | 0.3 | 45  | 5   |
| stomach                      | E-MTAB-5214 | 2   | 0.7 | 0.1 |
| stomach                      | E-MTAB-3871 | 4   | -   | -   |
| stomach                      | E-MTAB-2836 | 3   | 1   | 0.3 |
| small intestine              | E-MTAB-3871 | 3   | 1   | 0.3 |
| small intestine              | E-MTAB-2836 | 0.1 | 2   | 0.4 |
| duodenum                     | E-MTAB-2836 | 0.2 | 2   | 0.3 |
| large intestine              | E-MTAB-3871 | 3   | 0.9 | 0.1 |
| colon                        | E-MTAB-513  | 2   | 0.8 | -   |
| colon, transverse            | E-MTAB-5214 | 0.2 | 0.4 | -   |
| gall bladder                 | E-MTAB-2836 | 0.3 | 3   | 1   |
| greater omentum              | E-MTAB-5214 | 6   | 13  | 1   |
| kidney, cortex               | E-MTAB-5214 | 1   | 2   | 0.4 |
| kidney                       | E-MTAB-4344 | 1   | -   | -   |
| kidney                       | E-MTAB-3716 | 1   | 4   | 0.3 |
| kidney                       | E-MTAB-513  | 3   | 1   | 0.4 |
| kidney                       | E-MTAB-2836 | 2   | 1   | 0.3 |
| kidney, left                 | E-MTAB-3871 | 8   | 0.4 | 0.2 |

|                             |             |     |     |     |
|-----------------------------|-------------|-----|-----|-----|
| kidney, right               | E-MTAB-3871 | 8   | 0.6 | 0.3 |
| kidney, renal cortex        | E-MTAB-3871 | 7   | 0.3 | 0.2 |
| kidney, renal cortex left   | E-MTAB-3871 | 7   | 0.5 | 0.3 |
| kidney, renal cortex, right | E-MTAB-3871 | 5   | 0.2 | 0.2 |
| kidney, renal pelvis        | E-MTAB-3871 | 7   | 0.3 | 0.1 |
| kidney, renal pelvis left   | E-MTAB-3871 | 7   | 0.6 | 0.2 |
| kidney, renal pelvis, right | E-MTAB-3871 | 6   | 0.3 | 0.3 |
| thyroid gland               | E-MTAB-5214 | 3   | 0.6 | 0.2 |
| thyroid gland               | E-MTAB-513  | 3   | 0.4 | 0.2 |
| thyroid gland               | E-MTAB-2836 | 5   | 0.3 | 0.2 |
| brain                       | E-MTAB-513  | 0.9 | 0.1 | -   |
| brain                       | E-MTAB-4344 | 2   | -   | 0.1 |
| temporal lobe               | E-MTAB-3716 | 0.3 | 0.6 | 1   |
| pituitary gland             | E-MTAB-5214 | 0.8 | 0.4 | 0.1 |

Experiments included: E-MTAB-2836 (Raw Data Provider: The Human Protein Atlas), E-MTAB-5214 (The Genotype-Tissue Expression (GTEx) pilot analysis) [49], E-MTAB-513 (RNA-Seq of human individual tissues and mixture of 16 tissues), E-MTAB-4344 (The ENCODE (Raw Data Provider: Encyclopedia of DNA Elements) Consortium), E-MTAB-3827 and E-MTAB-3819 (These studies makes use of data generated by the Blueprint Consortium. A full list of the investigators who contributed to the generation of the data is available from [www.blueprint-epigenome.eu](http://www.blueprint-epigenome.eu). Funding for the project was provided by the European Union's Seventh Framework Programme (FP7/2007-2013) under grant agreement no 282510 – BLUEPRINT.), E-MTAB-3871 (Integrative analysis of 111 reference human epigenomes.) [50], E-MTAB-3716 (The evolution of gene expression levels in mammalian organs.) [51]
