# Supplementary material for: Metabolites of lactic acid bacteria present in fermented foods are highly potent agonists of human hydroxycarboxylic acid receptor 3
Source: PubMed Central journal article supplement (PMC6532841; doi:10.1371/journal.pgen.1008145), 2019-05-23
Supplement: pgen.1008145.s015.pdf [file pgen.1008145.s015.pdf]

**Supplementary Table S8**  
Sources of genomic DNA used for HCAR amplification

| <b>species</b>                  |                      | <b>source</b>                                                                                                 |
|---------------------------------|----------------------|---------------------------------------------------------------------------------------------------------------|
| <i>Gorilla gorilla</i>          | Western Gorilla      | Dr T. Haaf, MPI Molecular Genetics Berlin, Germany;<br>Dr L. Vigilant, MPI, Leipzig, Germany                  |
| <i>Homo sapiens</i>             | human                | Dr M. Stoneking, MPI, Leipzig, Germany;<br>D. Sere, MPI, Leipzig, Germany                                     |
| <i>Mus musculus</i>             | house mouse          | Dr A. Orth, University of Montpellier, France                                                                 |
| <i>Nomascus leucogenys</i>      | white-cheeked Gibbon | Dipl. Biol. C. Roos, Primate Center Göttingen, Germany                                                        |
| <i>Pan paniscus</i>             | bonobo               | Dr W. Enard, MPI, Leipzig, Germany;<br>Dr L. Vigilant, MPI, Leipzig, Germany                                  |
| <i>Pan troglodytes</i>          | chimpanzee           | Dr T. Haaf, MPI Molecular Genetics Berlin, Germany;<br>Dr W. Enard, MPI, Leipzig, Germany                     |
| <i>Pongo pygmaeus</i>           | Orangutan            | Dr M. Rocchi, University of Bari, Italy;<br>Dr W. Enard, MPI, Leipzig, Germany                                |
| <i>Symphalangus syndactylus</i> | siamang              | Dipl. Biol. C. Roos, Primate Center Göttingen, Germany;<br>Dr T. Haaf, MPI Molecular Genetics Berlin, Germany |
