# Supplementary material for: Metabolites of lactic acid bacteria present in fermented foods are highly potent agonists of human hydroxycarboxylic acid receptor 3
Source: PubMed Central journal article supplement (PMC6532841; doi:10.1371/journal.pgen.1008145), 2019-05-23
Supplement: pgen.1008145.s016.pdf [file pgen.1008145.s016.pdf]

**Supplementary Table S9**  
Primers used for HCA<sub>1</sub>, HCA<sub>2</sub> and HCA<sub>3</sub> ortholog amplification, sequencing and introduction of epitope tags

| <b>ID</b> | <b>sequence (5' - 3')</b>                    | <b>purpose</b>                            |
|-----------|----------------------------------------------|-------------------------------------------|
| 789       | gtgcaaatcaagaactgctcctc                      | pcDps forward (amplification/sequencing)  |
| 790       | cctggttcttccgcctcagaag                       | pcDps reverse (amplification/sequencing)  |
| 2291      | cgccgactagttcacttatcgtcatcgtccttatagtc       | FLAG-uni- <i>Spe I</i> AS                 |
| 2292      | cgccgggtacctcactcacttatcgtcatcgtccttatagtc   | FLAG-uni- <i>KpnI</i> AS                  |
| 2285      | cggaattccccaccatgtaccctacgacgtccccgactacgcc  | HA-uni-Kozak- <i>Eco RI</i> S             |
| 2289      | cgccccggggccaccatgtaccctacgacgtccccgactacgcc | HA-uni-Kozak- <i>Xma I</i> S              |
| 250       | CTGTTTCATGTAGGTGAAGCTGAG                     | GPR81-AS-apes-830                         |
| 251       | TTGGCCGACTCCATGAT                            | GPR81-AS-apes-540                         |
| 252       | CCGACAGAATGAGAAGGATGC                        | GPR81-AS-apes-3UTR                        |
| 253       | ACTCACTTCAATCAACTGGAACCT                     | GPR81-AS-apes-3UTR2                       |
| 254       | GCGACCCGGTTCATCAT                            | GPR81-S-apes-660                          |
| 255       | CACCACGCGGTGAACACTAT                         | GPR81-S-apes-370                          |
| 256       | GGTGAGTGCTAACGCTCAGAT                        | GPR81-S-apes-5UTR                         |
| 257       | TTTCTGGCTGAAGTTTCTCTTC                       | GPR81-S-apes-5UTR2                        |
| 258       | TCCCTGAGTCCATTTCTGCTAA                       | GPR109-AS-apes-3UTR2                      |
| 259       | CTTGCAACCAGTCTCCACT                          | GPR109-AS-apes-3UTR                       |
| 260       | AAGAGATGATGGCTGCTGTCC                        | GPR109-AS-apes-440                        |
| 261       | ATGTAGGTGAAGCTGAGAGTGATAAAG                  | GPR109-AS-apes-820                        |
| 262       | GACTGGAAGTTTGGGGACATC                        | GPR109-S-apes-280                         |
| 263       | CGCTYCATCGGACYMMCT                           | GPR109-S-apes-5UTR                        |
| 264       | AGCCTGCGGCAGAGACA                            | GPR109-S-apes-640                         |
| 265       | CACTCATGAATCSGCACCA                          | GPR109-S-apes-ATG                         |
| 266       | GCTGATGCTCTTCATGTTGG                         | GPR109a-S-apes-310                        |
| 267       | TTCTGGATCGGCATCTTCTTCT                       | GPR109a-AS-apes-500                       |
| 268       | GGCTGGTGCTCTTCATGTTT                         | GPR109b-S-apes-310                        |
| 269       | CAGTGCCATTCTGGATCAGC                         | GPR109b-AS-apes-500                       |
| 270       | CAACACCCTGACATGACATAAAG                      | GPR109-S-apes-5UTR2                       |
| 271       | ACACACTTGGAGATCCCCTG                         | mouse-GPR81-AS-wo-TGA                     |
| 272       | GACAACGGGTCGTGCTGT                           | mouse-GPR81-S-wo-ATG                      |
| 273       | ACGAGATGTGGAAGCCAGATAAG                      | mouse-GPR109-AS-wo-TGA                    |
| 274       | AGCAAGTCAGACCATTTTCTAGTGATA                  | mouse-GPR109-S-wo-ATG                     |
| 275       | ccccgactacgccGACAACGGGTCGTGCTGT              | mouse-GPR81-S-HA-adaptor                  |
| 276       | cgtcatcgtccttatagtcACACACTTGGAGATCCC         | mouse-GPR81-AS-FLAG-adaptor               |
| 277       | ccccgactacgccAGCAAGTCAGACCATTTTC             | mouse-GPR109-S-HA-adaptor                 |
| 278       | cgtcatcgtccttatagtcACGAGATGTGGAAGCCA         | mouse-GPR109-AS-FLAG-adaptor              |
| 279       | ccccgactacgccTACAACGGrTCGTGCTG               | GPR81S-apes-HA-adaptor                    |
| 280       | cgtcatcgtccttatagtcGTGCCACTCAACAATGT         | GPR81AS-apes-wo-gibbon-orang-FLAG-adaptor |
| 281       | cgtcatcgtccttatagtcTTTGTCACTGATGCC           | GPR81AS-orang-FLAG-adaptor                |
| 282       | cgtcatcgtccttatagtcCTCAACAATGTGGGGAT         | GPR81AS-gibbon-FLAG-adaptor               |
| 283       | ccccgactacgccAATCCGCACCATCTGCAG              | GPR109-S-apes-wo-orang109b-HA-adaptor     |
| 284       | ccccgactacgccAATCCGCACCATCCG                 | GPR109b-S-orang-HA-adaptor                |
| 285       | cgtcatcgtccttatagtcAGGAGAGGTTGGGCC           | GPR109-AS-apes-wo-orang109ab-FLAG-adaptor |
| 286       | cgtcatcgtccttatagtcAGGGGArGTTGGGC            | GPR109-AS-orang109ab-FLAG-adaptor         |
| 287       | tggcgaggcatatctgtgta                         | mouseGPR109-S-504                         |
| 288       | ccctcttgatcttggcatgt                         | mouseGPR109-AS-667                        |
